# Supplementary material for: WIPI3 and WIPI4 β-propellers are scaffolds for LKB1-AMPK-TSC signalling circuits in the control of autophagy
Source: Nat Commun. 2017 May 31;8:15637. doi: 10.1038/ncomms15637 (PMC5460038; doi:10.1038/ncomms15637)
Supplement: Supplementary Information — Supplementary Figures, Supplementary Note, and Supplementary References [file ncomms15637-s1.pdf]

Supplementary Figure 1

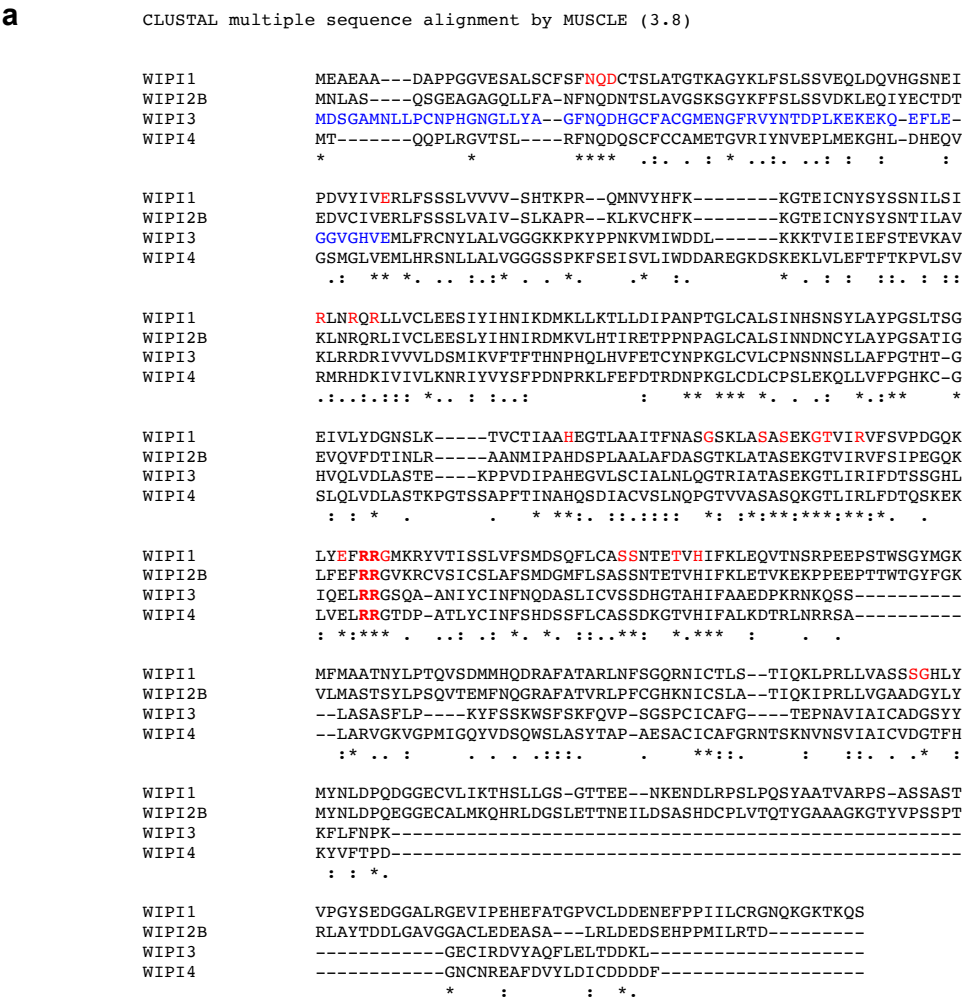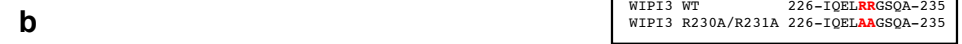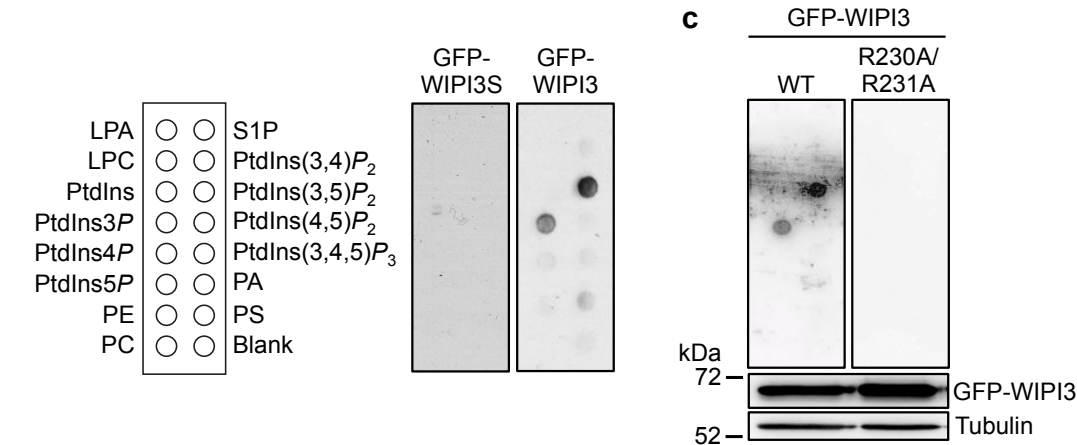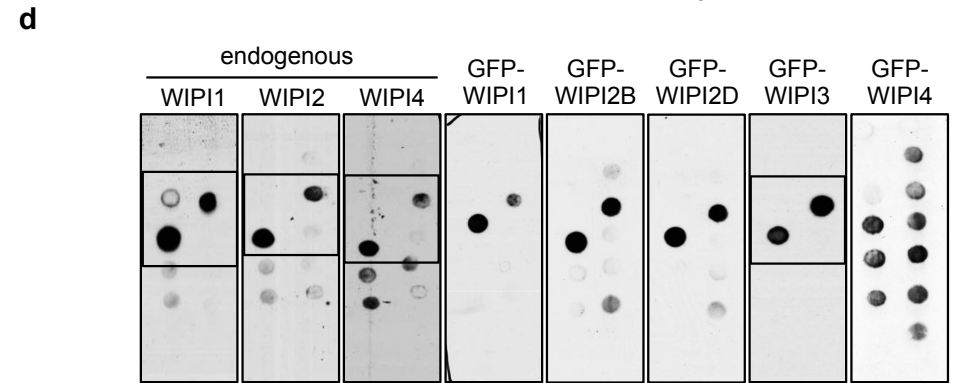

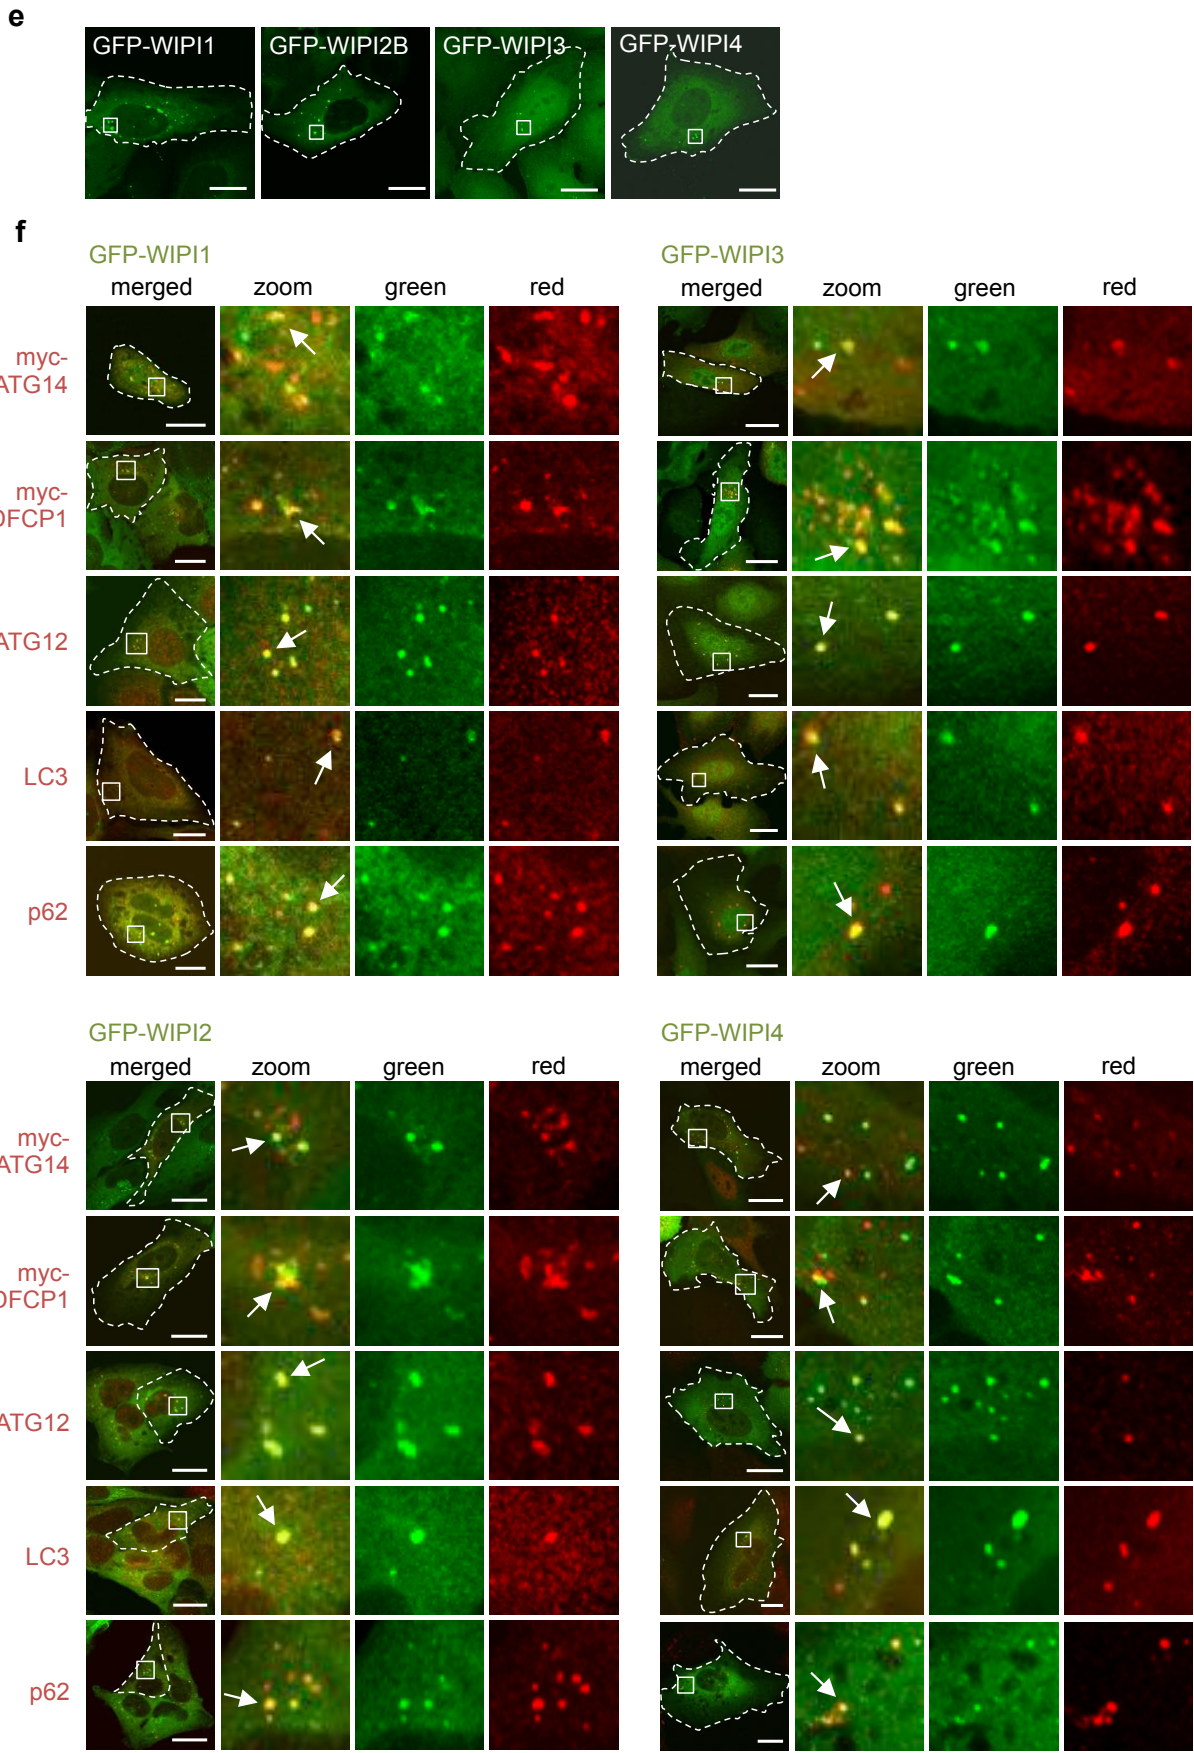

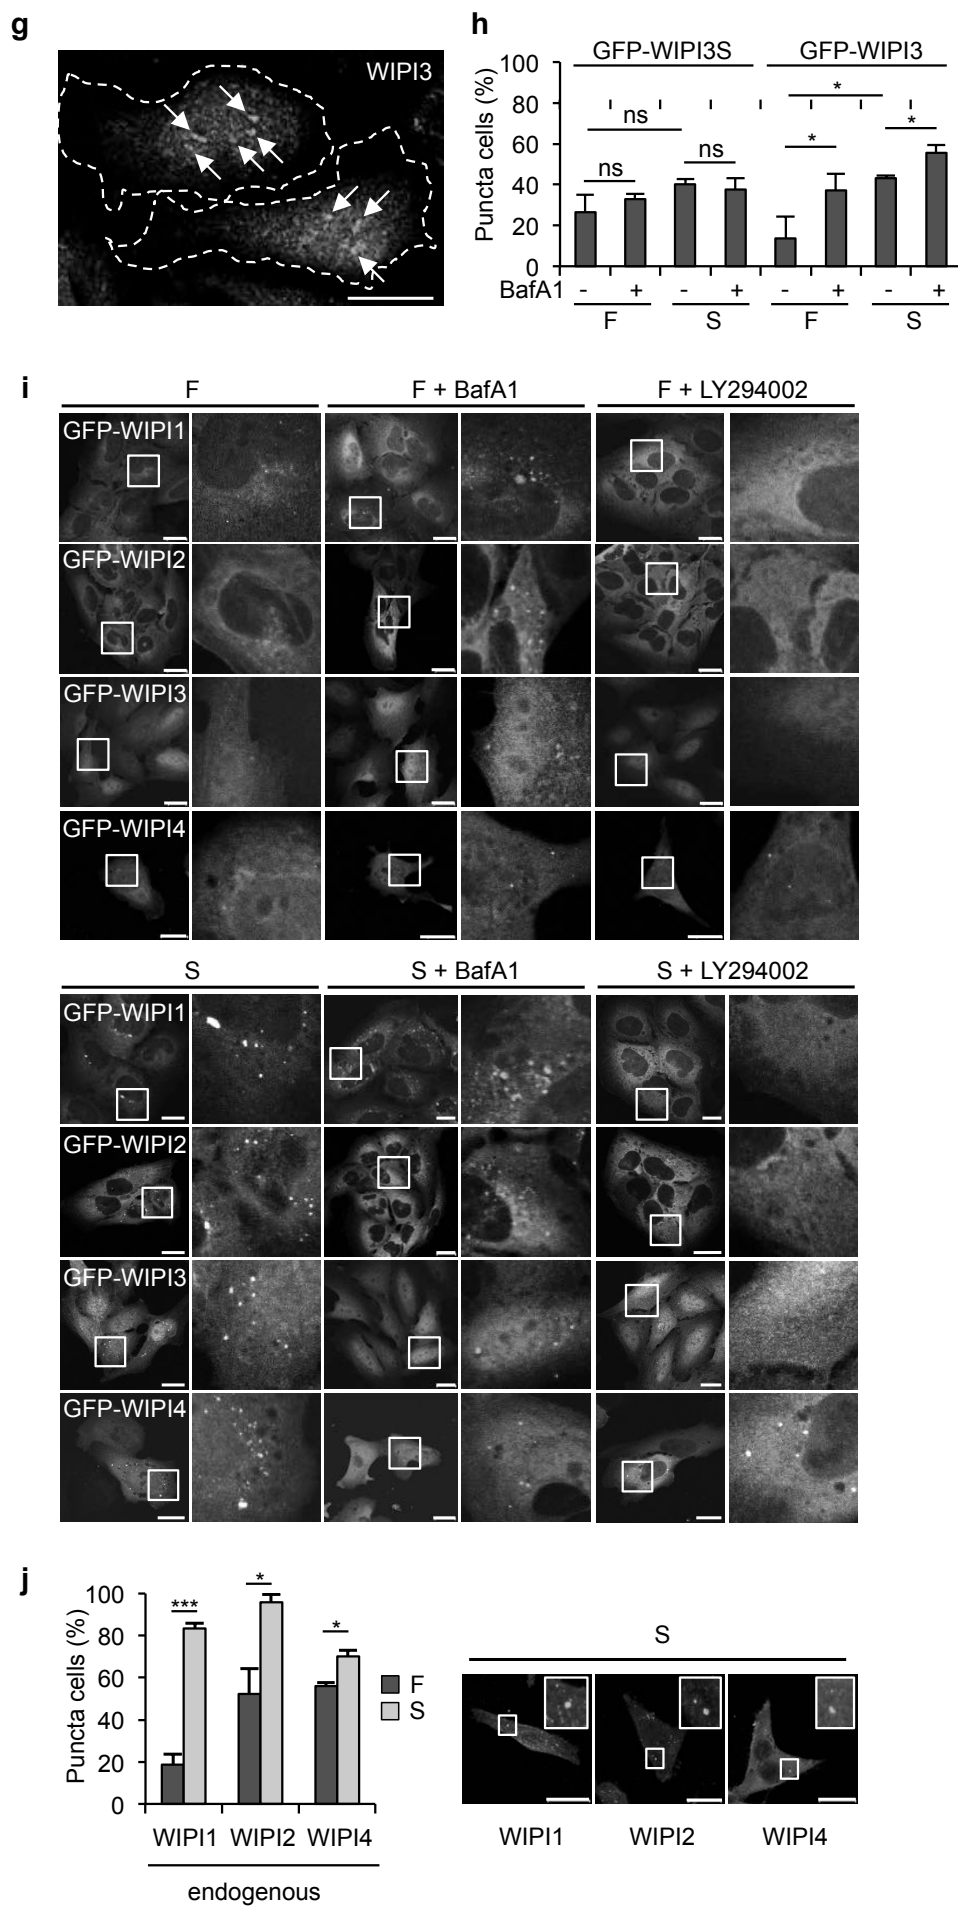

**Supplementary Figure 1** (a) Multiple protein sequence alignments of WIPI1, WIPI2B, WIPI3 and WIPI4. Two arginine residues crucial for phospholipid binding are conserved and highlighted with bold red letters in all WIPI sequences. Further amino acids homologous in WIPI proteins and further PROPPIN members<sup>1</sup> are highlighted with red letters in WIPI1 only. Black letters in the WIPI3 protein sequence represent the original sequence (referred to as WIPI3S hereafter), blue letters indicate the new extended WIPI3 N-terminal sequence cloned in this study (GenBank accession number KX434429). (b) Scheme of PIP strip membranes used in this study (left). Phospholipid-protein overlay assays of GFP-WIPI3S or GFP-WIPI3 transiently expressed in U2OS cells (right panels). (c) As indicated, a phospholipid-binding mutant of WIPI3 R230A/R231A was used along with GFP-WIPI3 WT for phospholipid-protein overlay assays (upper panels) and immunoblotting (lower panels). (d) Phospholipid-protein overlay assays of G361 cells immunoblotted with anti-WIPI1, anti-WIPI2 or anti-WIPI4 antibodies (boxed sections presented in Figure 1b). Phospholipid-protein overlay assays of stable GFP-WIPI1, GFP-WIPI2B, GFP-WIPI2D, GFP-WIPI3 U2OS cells (boxed sections presented in Figure 1b) or U2OS cells transiently expressing GFP-WIPI4 with anti-GFP antibodies. (e) Supporting full-cell images for magnified sections (white boxes) in Figure 1b (cell boundaries: dotted lines). (f) Supporting full panels for magnified merged sections (white boxes) in Figure 1d (cell boundaries: dotted lines). (g) Starved G361 cells (3 h) were immunostained for confocal LSM using anti-WIPI3/IgG-Alexa Fluor 488 antibodies (cell boundaries: dotted lines, WIPI3 puncta: arrows). (h) U2OS cells transiently expressing GFP-WIPI3S or GFP-WIPI3 were fed (F) or starved (S) with or without BafA1. The mean percentages of GFP-WIPI3-puncta-positive cells were calculated (up to 336 cells per condition, n=3). (i) Representative images of cells quantified in Figure 1c. (j) G361 cells were fed (F) or starved (S) for 3 h and immunostained using anti-WIPI1/IgG-Alexa Fluor 488, anti-WIPI2/IgG-Alexa Fluor 488 or anti-WIPI4/IgG-Alexa Fluor 488 antibodies. The mean percentages of endogenous WIPI puncta-positive cells (up to 350 cells per condition, n=3) are presented. Mean  $\pm$  SD; heteroscedastic t-testing; *p*-values: \**p*<0.05; \*\**p*<0.01; \*\*\**p*<0.001; ns: not significant. Scale bars: 20  $\mu$ m. Statistics and source data can be found in Supplementary Data 1.

Supplementary Figure 2

a

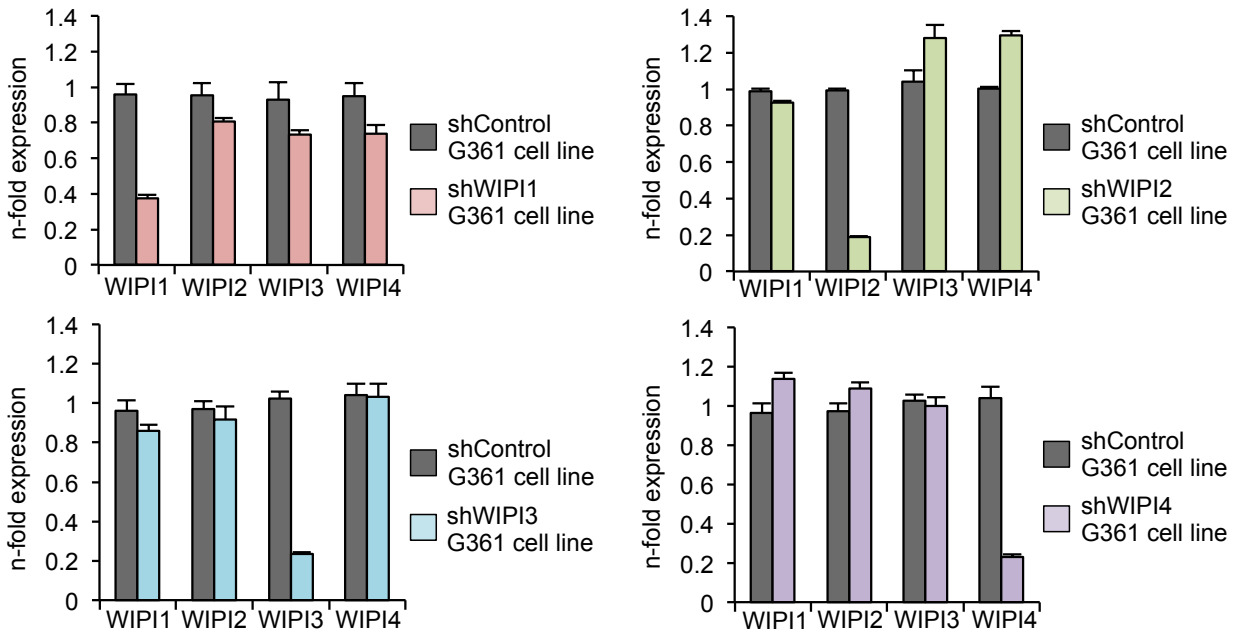

b

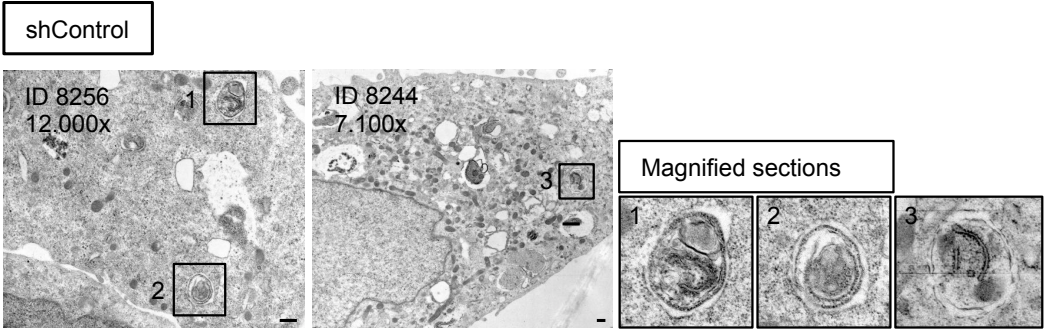

c

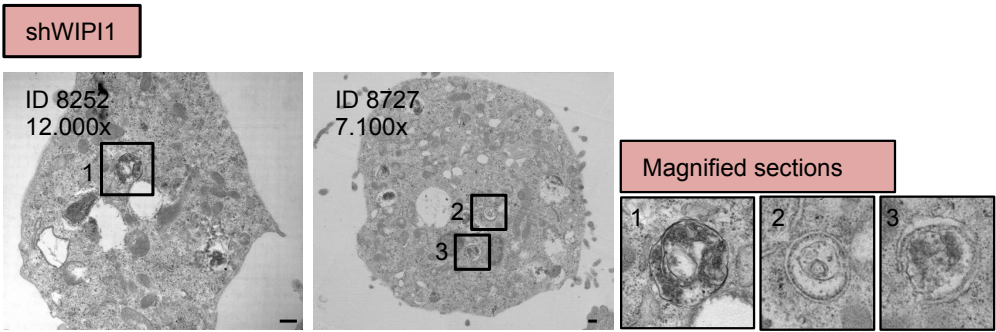

d

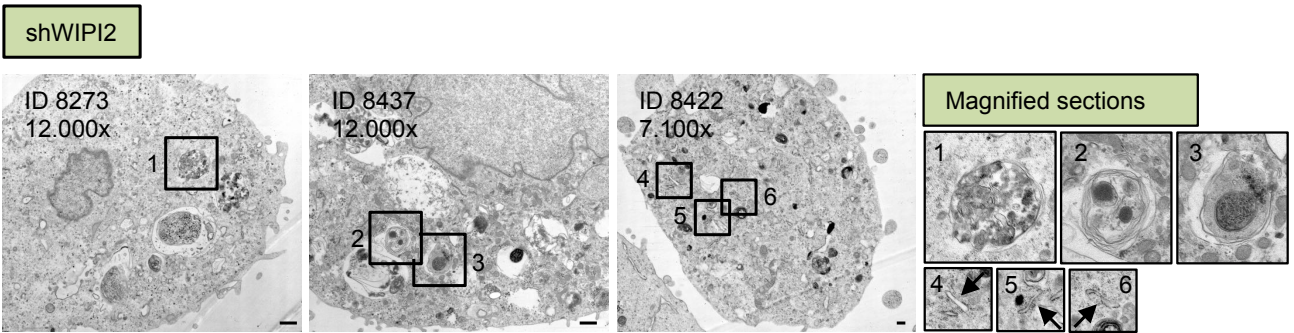

# Supplementary Figure 2

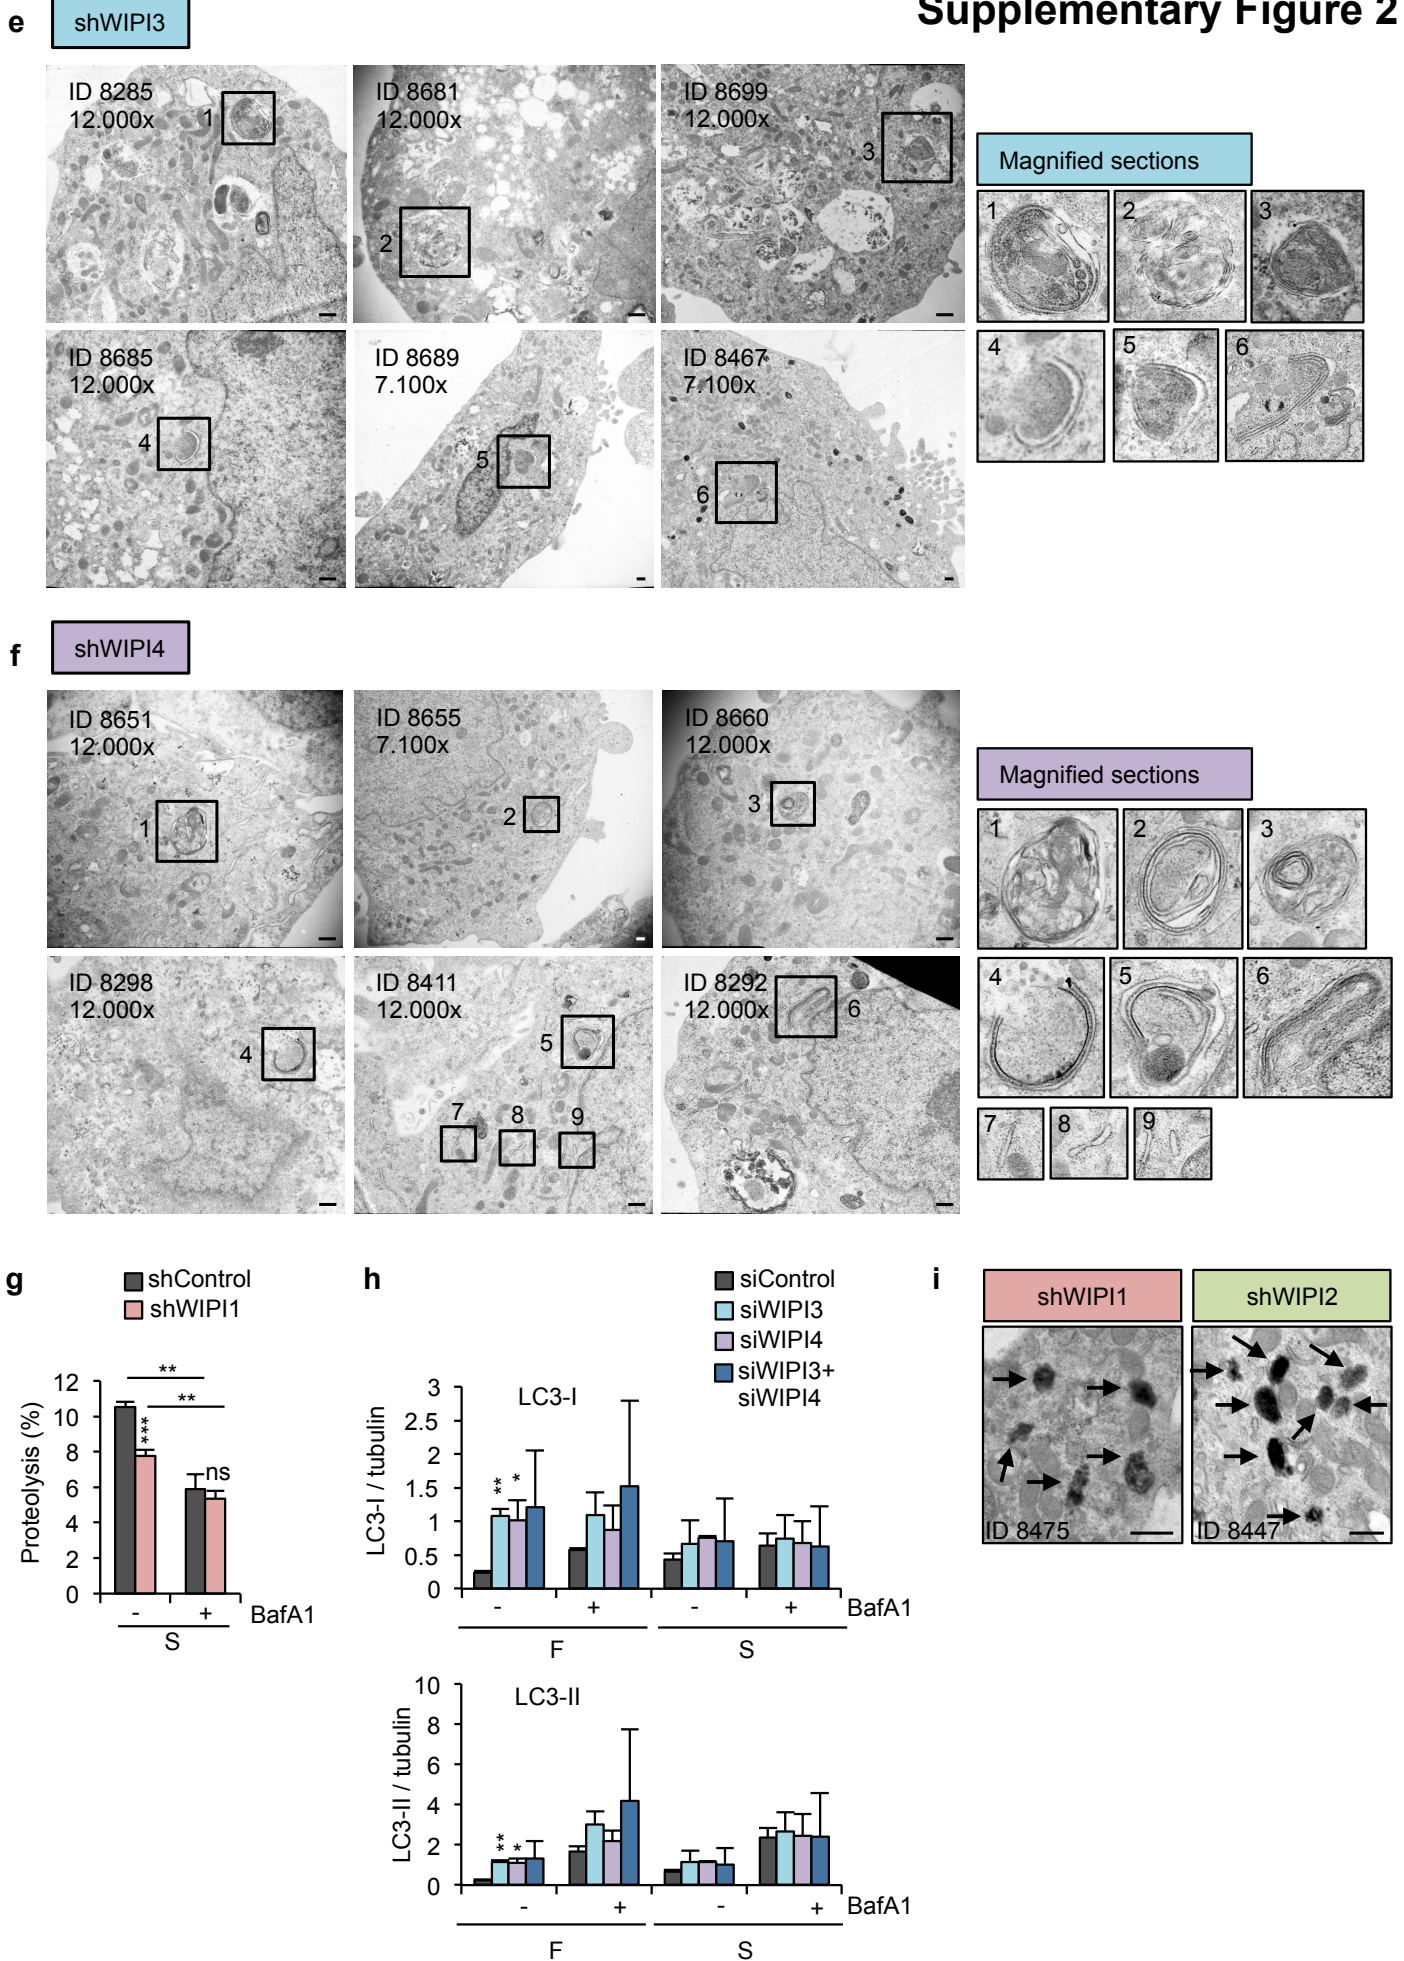

**Supplementary Figure 2** (a) Supporting WIPI mRNA abundance assessments by quantitative RT-PCR for results in Figure 2a. (b) Supporting EM images of G361 cells stably expressing control shRNA (shControl). Full EM images: left panels, magnified autophagosomes: right panels). The autophagosome shown in magnified section 1 is presented in Figure 2b. (c) Likewise, supporting EM images of stable G361-WIPI1-KD cells (shWIPI1) are presented. The autophagosome in magnified section 1 is presented in Figure 2b. Autophagosomal structures in G361-WIPI1-KD cells were 2.65 fold reduced when compared to shControl cells. (d) Supporting EM images of stable G361-WIPI2-KD (shWIPI2). Magnified sections (upper panel) indicate the appearance of autophagosomes (reduced by 2.94 fold when compared to shControl cells). RER tubular structures, indicative of an inhibition of early steps in autophagosome formation, increased by 4.93 fold in G361-WIPI2-KD cells (see magnified sections in lower panel, magnified section 4 is presented in Figure 2b). (e) Supporting EM images of stable G361-WIPI3-KD (shWIPI3). The appearance of autophagosomes (magnified sections, upper panel) was reduced by 6.42 fold when compared to shControl cells while additionally, elongated phagophore-like structures appeared (magnified sections, lower panel). Magnified section 6 is presented in Figure 2b. (f) Supporting EM images of stable G361-WIPI4-KD cells. Autophagosomal structures (magnified sections, upper panel) were reduced by 3.47 fold when compared to shControl cells. Also, elongated phagophore-like structures appeared (magnified sections, middle panel, section 4 is presented in Figure 2b). Moreover, RER tubular structures (magnified sections, lower panel) accumulated by 3.91 fold when compared to shControl cells. (g) Stable G361-WIPI1-KD (shWIPI1) and control (shControl) cells were starved (S) for 3 h in the absence or presence of BafA1 and the percentages of autophagic proteolysis of long-lived proteins upon starvation (with or without bafilomycin A1, BafA1) were calculated based on triplicate sets (n=1). (h) Full quantification of western blot results shown in Figure 2f. (i) Appearance of melanosomes (arrows) in G361-WIPI1-KD (shWIPI1) and G361-WIPI2-KD (shWIPI2) cells. Scale bars: 500 nm. Mean  $\pm$  SD; heteroscedastic t-testing; *p*-values: \**p*<0.05; \*\**p*<0.01; \*\*\**p*<0.001; ns: not significant. EM magnifications are indicated (12.000x or 7.100x). Statistics and source data can be found in Supplementary Data 1.

Supplementary Figure 3

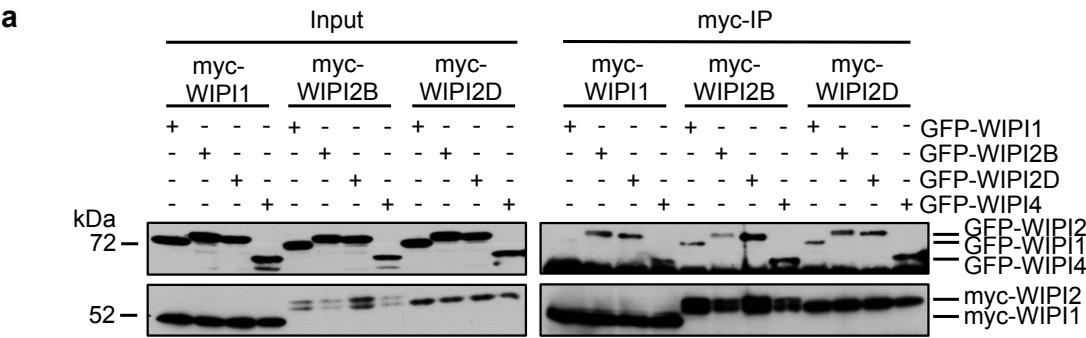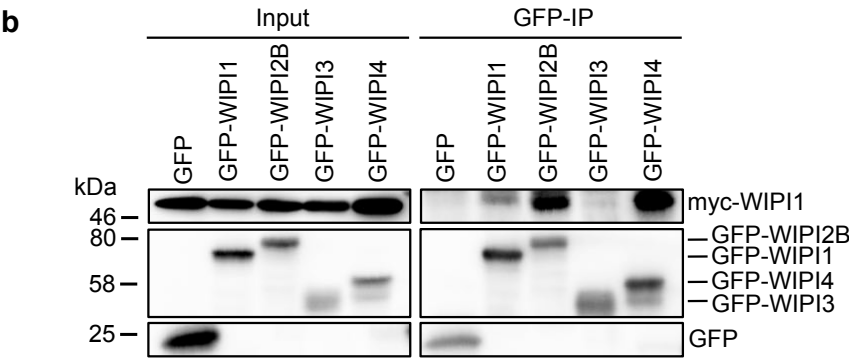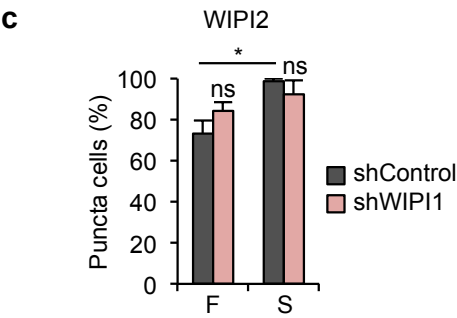

**Supplementary Figure 3** (a) U2OS cells transiently expressing GFP- (WIP1, WIP2B, WIP2D, WIP4) or myc-tagged WIP proteins (WIP1, WIP2B, WIP2D) were starved for 3 h, analysed by immunoprecipitation using anti-myc antibody and immunoblotted with anti-GFP or anti-myc antibodies. Input samples are shown on the left, immunoprecipitates (myc-IP) on the right. Associations between WIP1, WIP2B and WIP4 are demonstrated. (b) Self-association of WIP1, and association between WIP1 and WIP2B, as well as between WIP1 and WIP4 was confirmed by analysing U2OS cells transiently co-expressing GFP-WIP1, GFP-WIP2B or GFP-WIP4 and myc-tagged WIP1. Immunoprecipitation of GFP-WIP3 was negative for myc-tagged WIP1. (c) Stable G361-WIP1-KD (shWIP1) and control (shControl) cells were fed (F) or starved (S) for 3 h and endogenous WIP2 immunostained with anti-WIP2/IgG-Alexa Fluor 488 antibodies for confocal LSM. The mean percentages of WIP2 puncta-positive cells were calculated (up to 114 cells per condition, n=3). Mean  $\pm$  SD; heteroscedastic t-testing; *p*-values: \**p*<0.05; ns: not significant. Statistics and source data can be found in Supplementary Data 1.

### Supplementary Figure 4

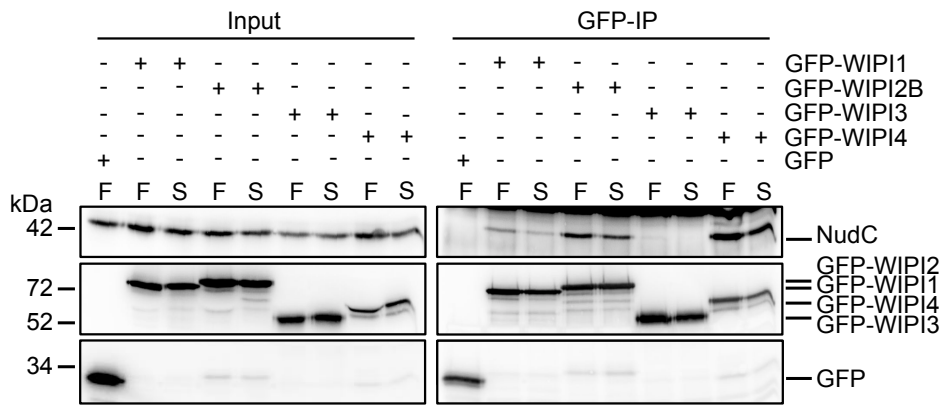

**Supplementary Figure 4** U2OS cells stably expressing GFP-WIP1, GFP-WIP2B, GFP-WIP3, GFP-WIP4 or GFP were fed (F) or starved (S) for 3 h and immunoprecipitated using anti-GFP antibodies. Immunoblotting was performed using anti-GFP and anti-NudC antibodies.

Supplementary Figure 5

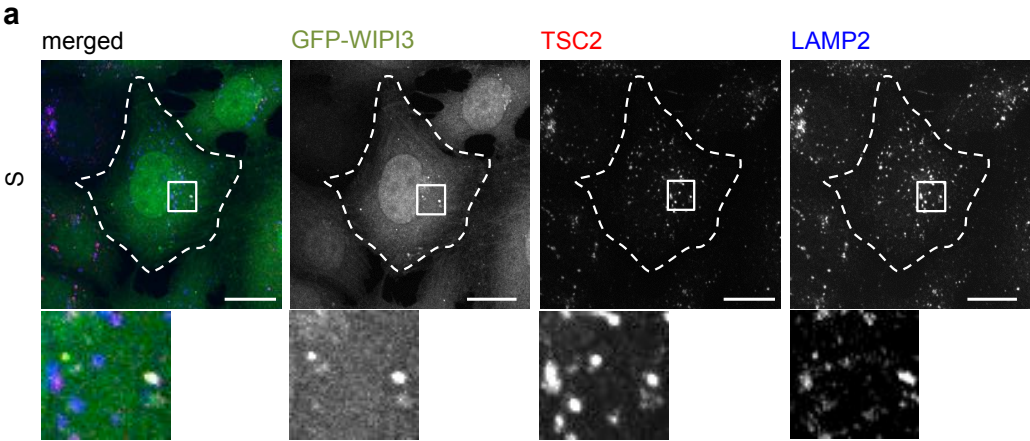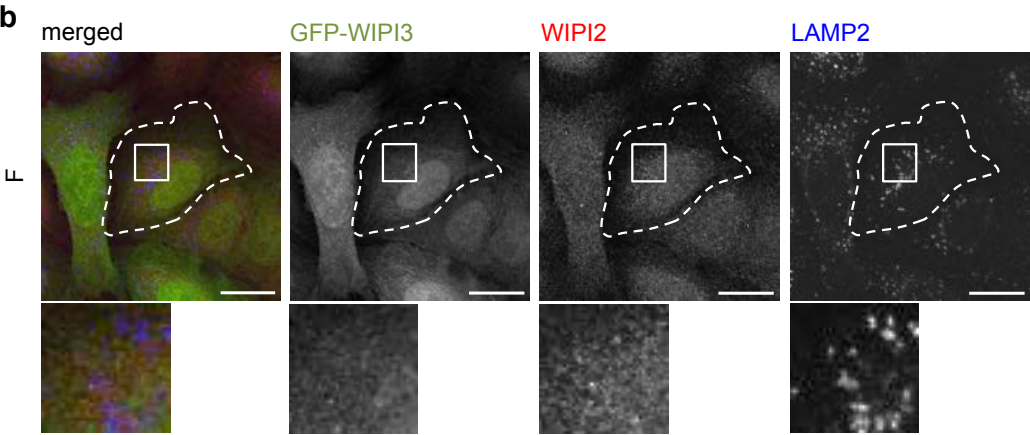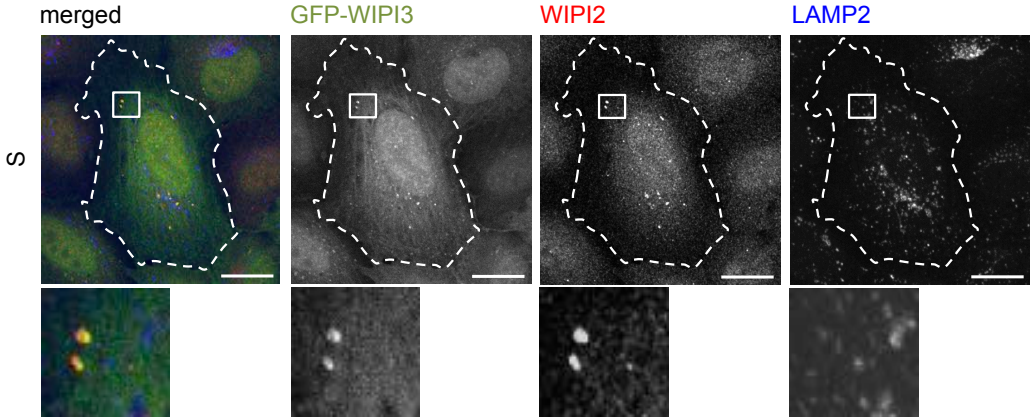

# Supplementary Figure 5

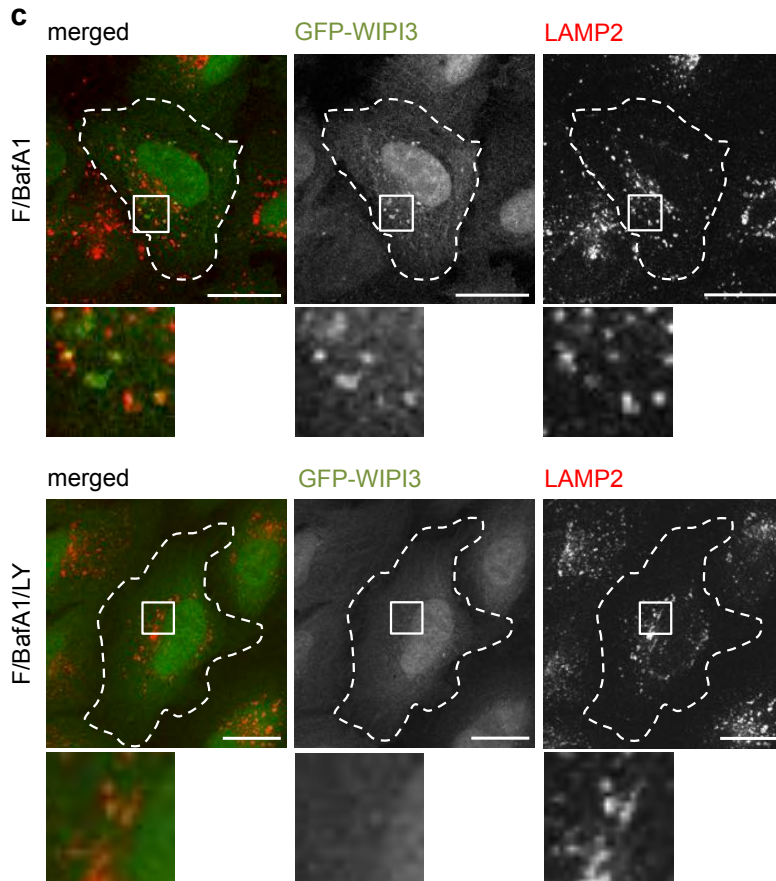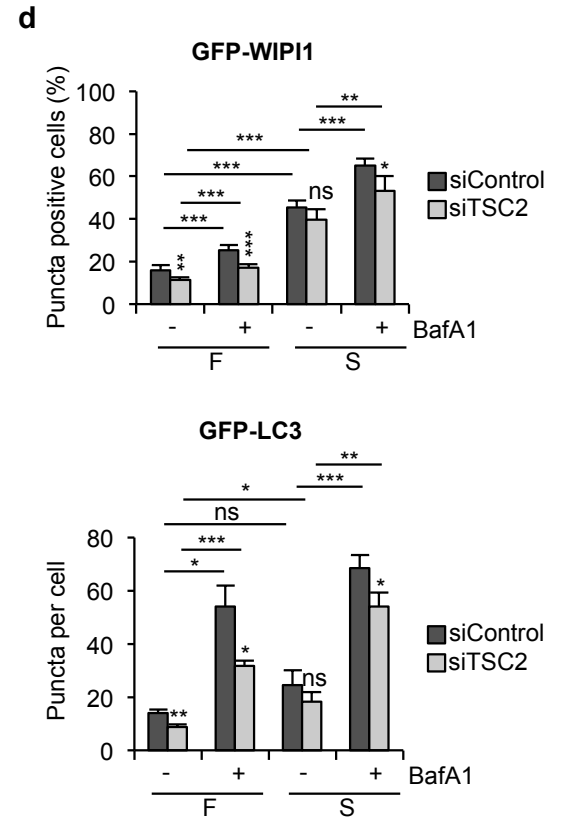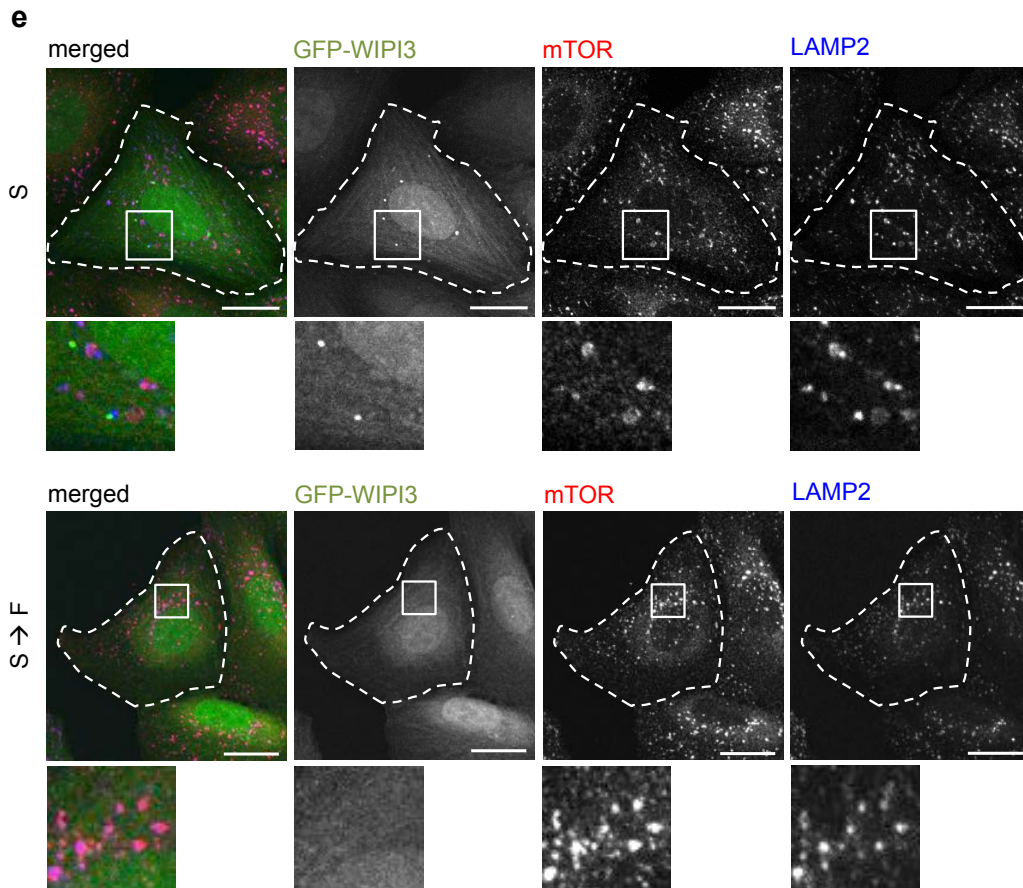

**Supplementary Figure 5** (a) Cell images of the magnified sections (shown here in the lower panels again) represented in Figure 5g. (b) Cell images of the magnified sections (shown here in the lower panels again) represented in Figure 5h. (c) U2OS cells stably expressing GFP-WIP1 were cultured for 3 h in control medium (F) supplemented with BafA1 in the absence (upper panel) or presence (lower panel) of LY294002 (LY). Cells were immunostained with anti-LAMP2/IgG-Alexa Fluor 546 antibodies and visualised by confocal LSM. Cell images and magnifications (white boxes) are presented. (d) U2OS cells stably overexpressing GFP-WIP1 or GFP-LC3 and transiently transfected with control siRNA or TSC2-targeting siRNA were fed (F) or starved (S) in the absence or presence BafA1. Assessments of GFP-WIP1 (upper panel) and GFP-LC3 puncta (lower panel) were conducted using an In Cell Analyzer 1000. Images from up to 7,771 GFP-WIP1 (n=5) or up to 4,697 GFP-LC3 cells per condition (n=3) were analysed. Mean numbers (+/-SD) of GFP-WIP1-puncta-positive cells (%) or GFP-LC3 puncta per cell are presented. (e) Cell images of magnified sections in Figure 5k (shown here in the lower panels again) are presented. Cell boundaries are indicated (dotted lines). Scale bars: 20  $\mu$ m. P-values: \*p<0.05; \*\*p<0.01; \*\*\*p<0.001; ns: not significant. Statistics and source data can be found in Supplementary Data 1.

Supplementary Figure 6

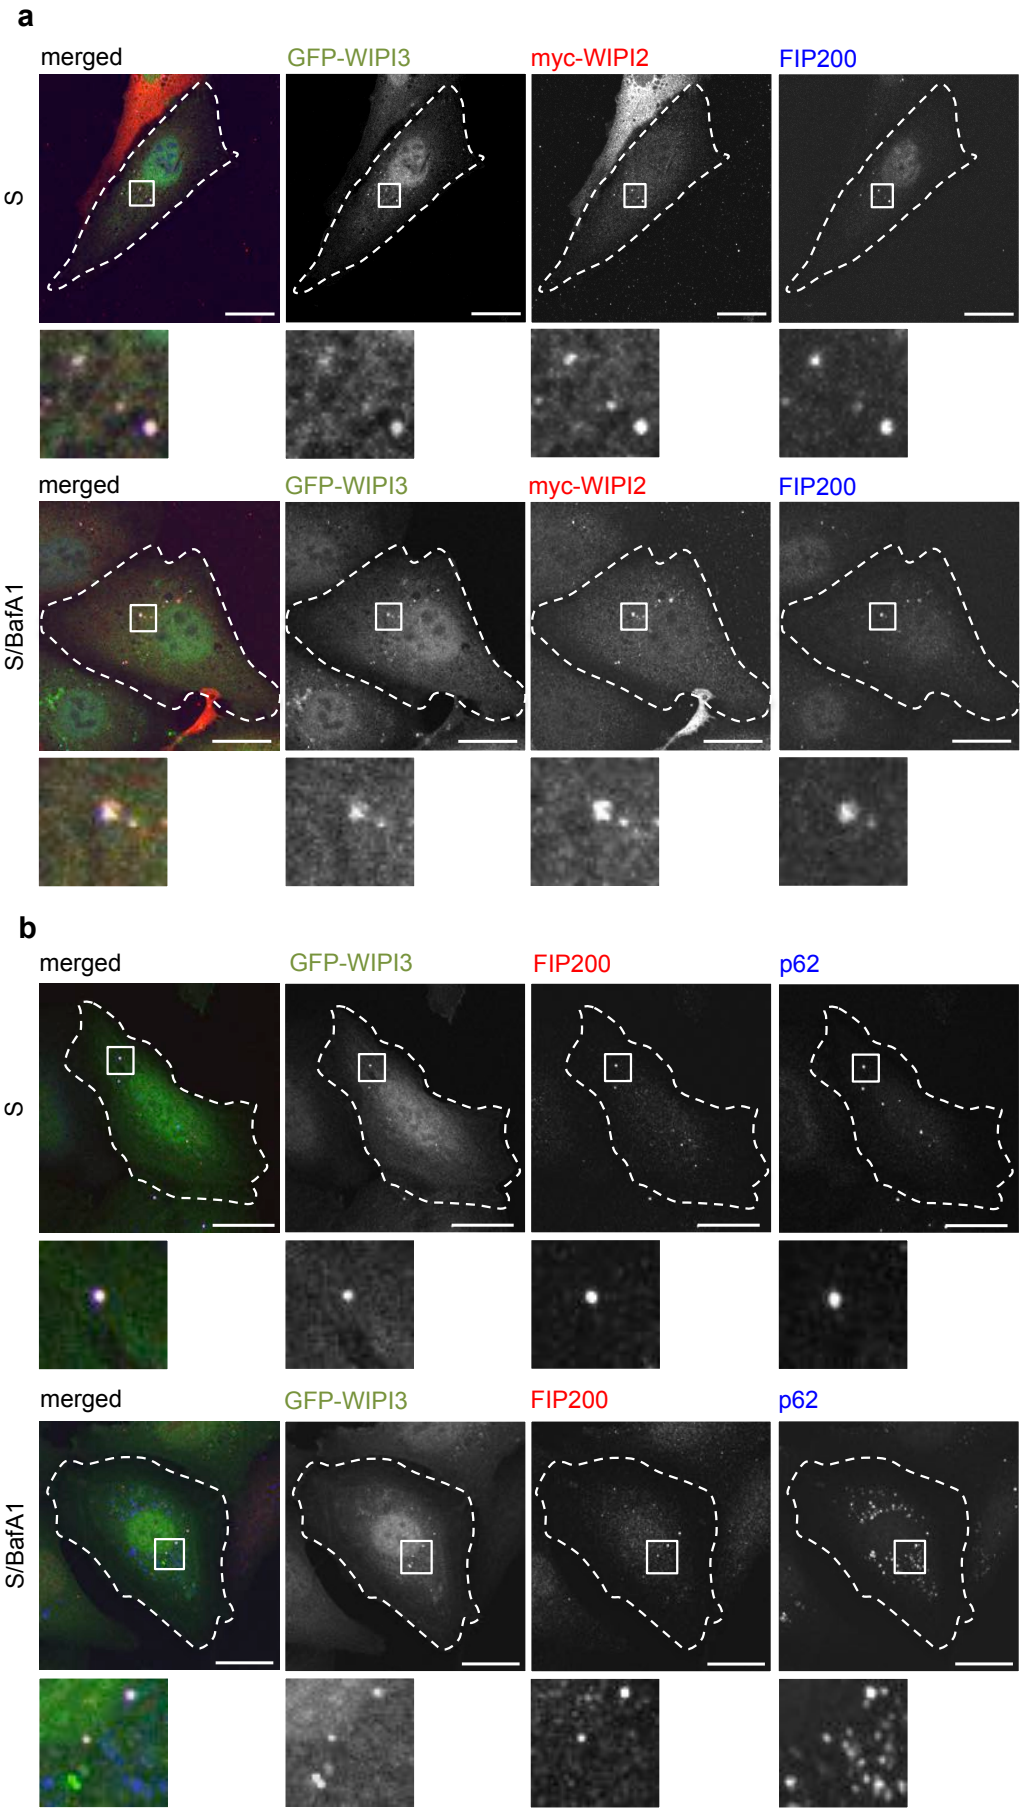

Supplementary Figure 6

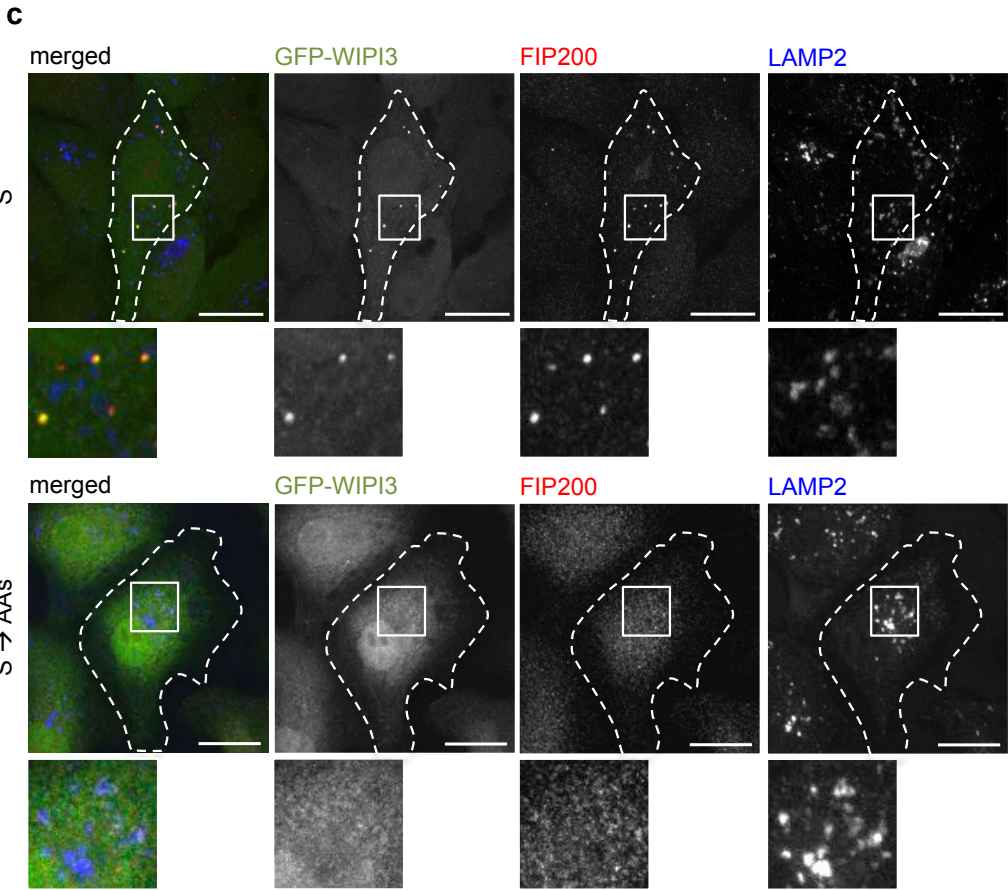

**Supplementary Figure 6** (a) Cell images of magnified sections (white boxes) in Figure 6b (shown here in the lower panels again) are presented. (b) Cell images of magnified sections (white boxes) in Figure 6c (shown here in the lower panels again) are presented. (c) Cell images of magnified sections (white boxes) in Figure 6h (shown here in the lower panels again) are presented. Cell boundaries are indicated (dotted lines). Scale bars: 20  $\mu\text{m}$ .

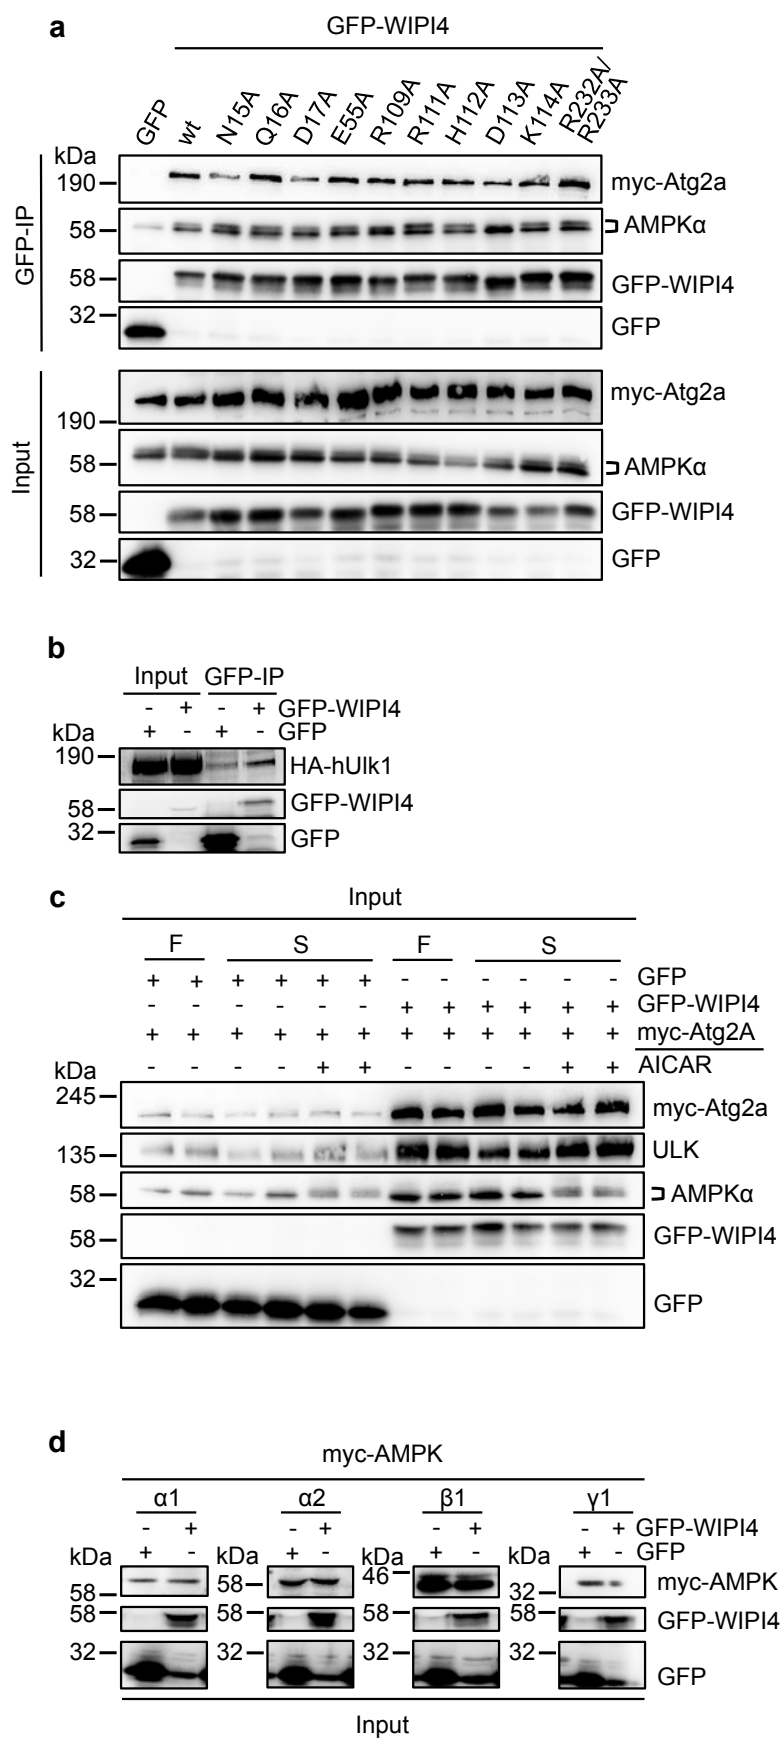

**Supplementary Figure 7** (a) Cell lysates of U2OS cells transiently expressing GFP or GFP-tagged WIPI4 wild-type (WT) or mutants (amino acid substitutions are indicated for each of the mutant WIPI4 proteins) and myc-ATG2A were analysed by immunoprecipitation using anti-GFP antibodies (upper panels). Immunoblotting was performed using anti-myc, anti-GFP or anti-AMPK $\alpha$  antibodies. Input samples are indicated (lower panels). (b) Cell lysates of U2OS cells transiently expressing GFP or GFP-WIPI4 and HA-tagged human ULK1 were analysed by immunoprecipitation using anti-GFP antibodies. Immunoblotting was performed using anti-HA and anti-GFP antibodies. (c) Input samples for the results presented in Figure 7h are shown. (d) Input samples for the results presented in Figure 7k are presented.

## Supplementary Figure 8

**a**

### Lentiviral-based shRNA screen targeting the human kinome for autophagy assessments

#### Primary Screen

Lentiviral-based shRNA library with 3109 different shRNAs targeting 673 human protein kinases

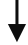

Infection of U2OS cells stably expressing GFP-WIP1 in 96-well plates

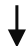

Serum starvation (3 h)

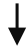

Automated high through-put GFP-WIP1 puncta image acquisition and analysis

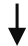

Selection of candidates based on histogram distribution differences with regard to control infections

#### Secondary Screen

Generation of monoclonal cell lines stably expressing lentiviral-derived shRNA constructs targeting candidate protein kinases

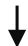

Amino acid starvation (3 h)

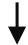

Automated high through-put GFP-WIP1 puncta image acquisition and analysis

**b**

| Targeted gene | p value     |
|---------------|-------------|
| ALPK3         | 0.027804016 |
| BRD3          | 0.005053786 |
| BRD4          | 0.001101193 |
| BRSK2         | 0.016222751 |
| CAMKK1        | 0.008694701 |
| CDC2L6        | 0.012722347 |
| CDC42BPB      | 0.001565819 |
| CDKL3         | 0.112191334 |
| CHEK-1        | 0.547902872 |
| CHUK          | 0.006735652 |
| CRKRS         | 0.085376527 |
| DAPK2         | 0.610800594 |
| DCLK2         | 0.276489172 |
| DYRK2         | 0.310518804 |
| EPHA1         | 0.045141    |
| FRK           | 0.029239985 |
| HCK           | 0.161027472 |
| JAK3          | 0.141298471 |
| LTK           | 4.95955E-09 |
| MAP3K2        | 0.62973672  |
| MAP4K1        | 3.02827E-09 |
| MAP4K4        | 0.000696531 |
| MAP4K5        | 0.029414705 |
| MERTK         | 1.72517E-09 |
| NEK5          | 6.75408E-08 |
| NTRK3         | 0.003184975 |
| NUAK2         | 0.043787497 |
| OXSRI         | 0.002543365 |
| PDGFRB        | 4.86401E-05 |
| PDIK1L        | 0.002170912 |
| PDK2          | 0.90075686  |
| PDK3          | 0.041611488 |
| PFTK1         | 0.26359669  |
| PLK2          | 0.546526909 |
| PRKAG1        | 0.283281129 |
| PRKCD         | 0.106740127 |
| PRKX          | 0.390784533 |
| RYK           | 6.86983E-05 |
| SRMS          | 4.06524E-05 |
| STK16         | 0.045557941 |
| STK25         | 0.481308667 |
| STK33         | 0.167445238 |
| TRPM7         | 9.1742E-08  |
| TSSK4         | 0.000334938 |
| TWF2          | 0.479403382 |
| TYK2          | 0.178102335 |
| VRK2          | 0.208043918 |
| WNK1          | 0.964108064 |

Supplementary Figure 8

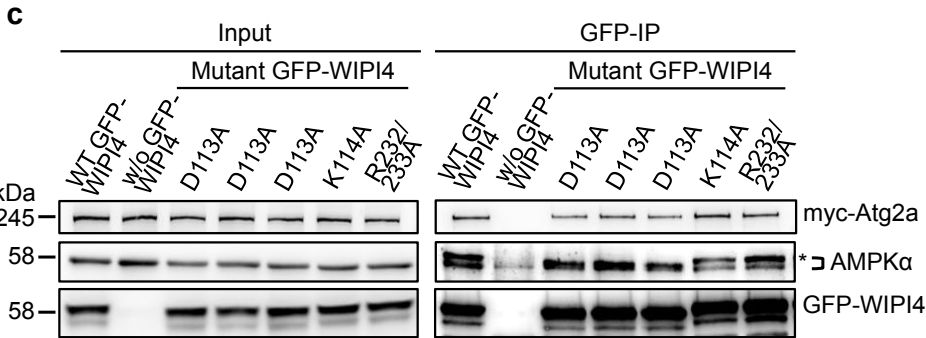

**Supplementary Figure 8** (a) Lentiviral-based shRNA screening procedure and results (b) using MISSION LentiExpress Human Kinases (Sigma-Aldrich). See Methods section for details. (c) To identify amino acids in WIPI4 conferring AMPK  $\alpha$  binding, a panel of mutant WIPI4 variants was assessed for specific binding to AMPK  $\alpha$  (Supplementary Figure 7a). Mutant WIPI4 D113A was identified and its impaired binding to AMPK  $\alpha$  (upper band, indicated with an asterisk, is missing) was confirmed (triplicate samples) by anti-GFP immunoprecipitation and immunoblotting with anti-myc, anti-AMPK  $\alpha$  and anti-GFP antibodies using cell lysates of U2OS cells transiently transfected with constructs encoding myc-ATG2A and GFP-WIPI4 wild-type (wt) or mutant proteins (D113A, K114A, R232/233A).

## Supplementary Figure 9

**Figure 1b**

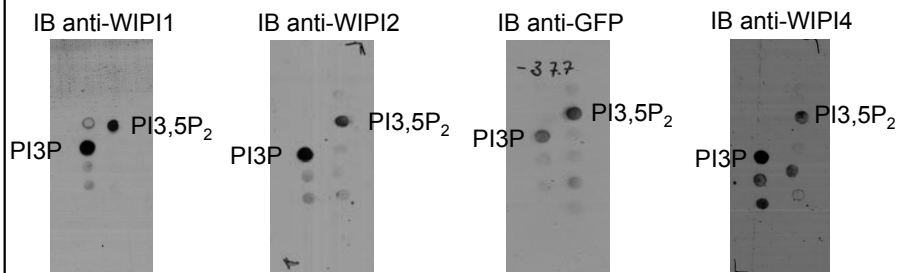

**Figure 2f**

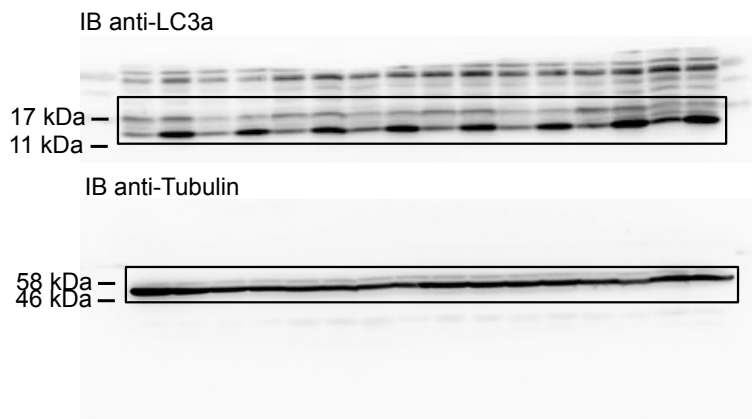

**Figure 4a**

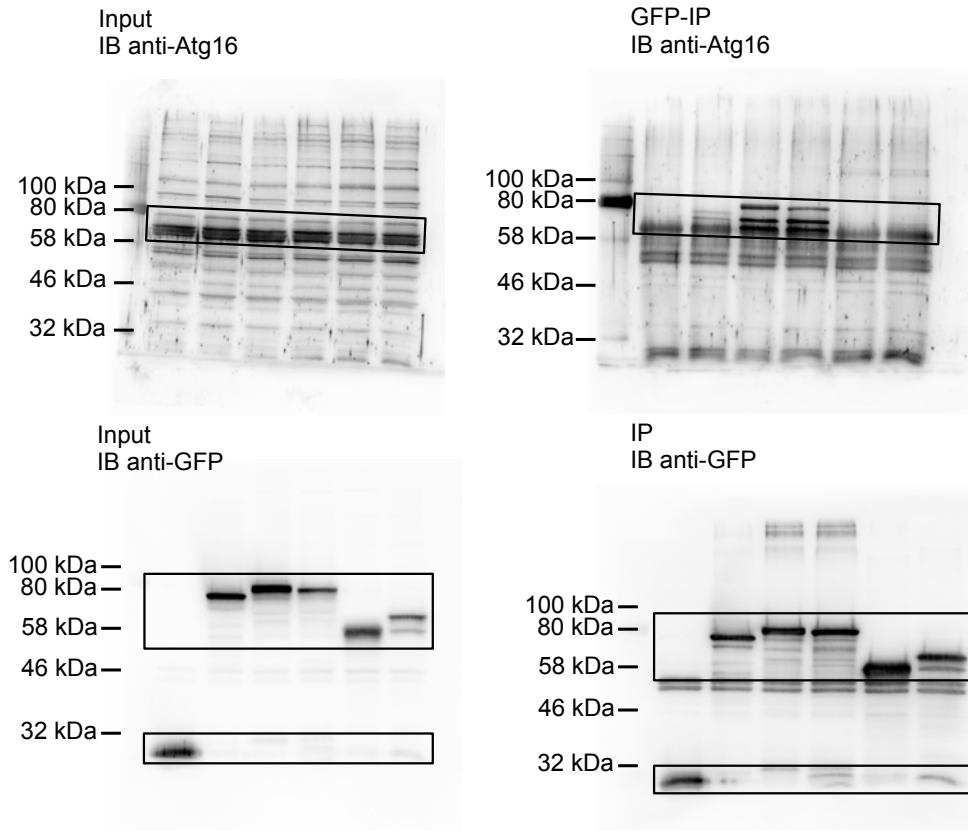

# Supplementary Figure 9

**Figure 5a**

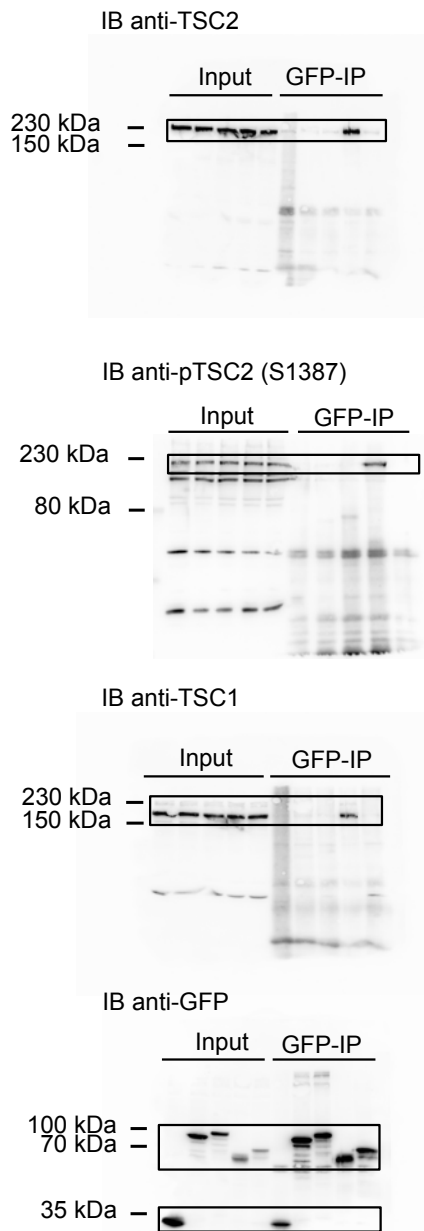

**Figure 5b**

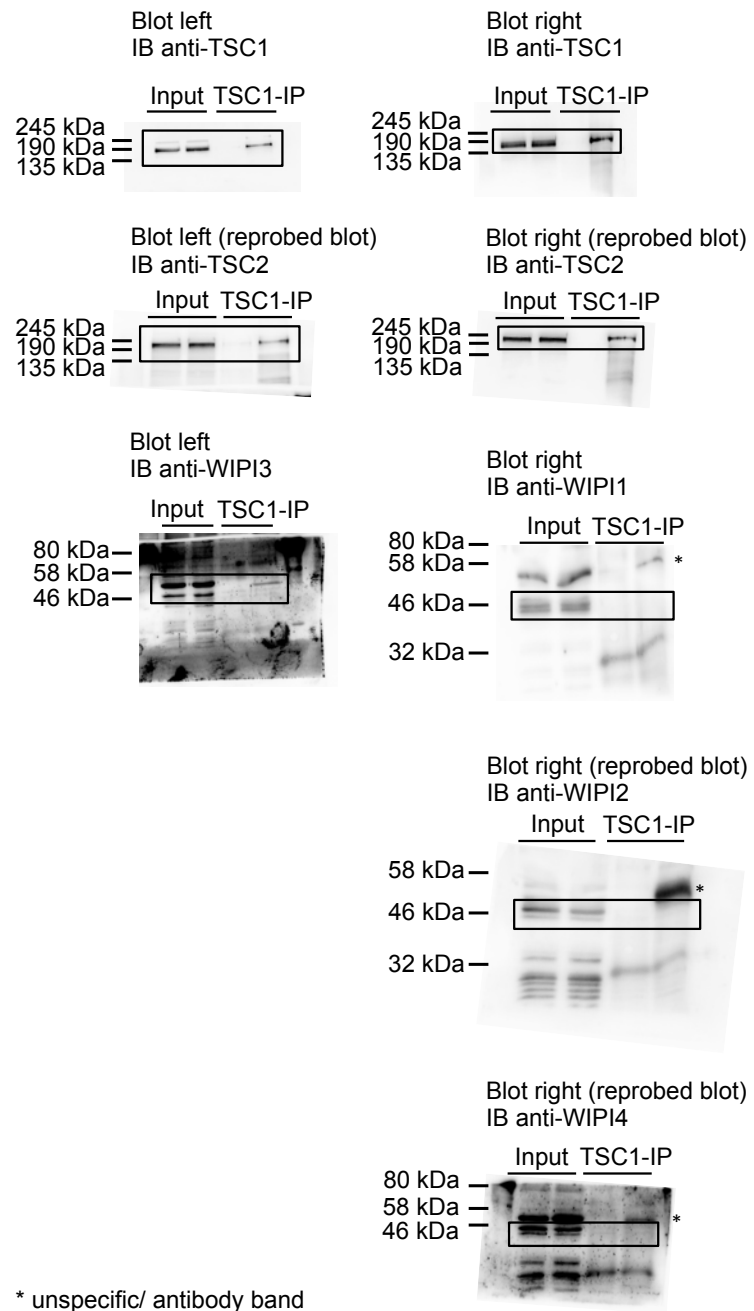

# Supplementary Figure 9

**Figure 5c**

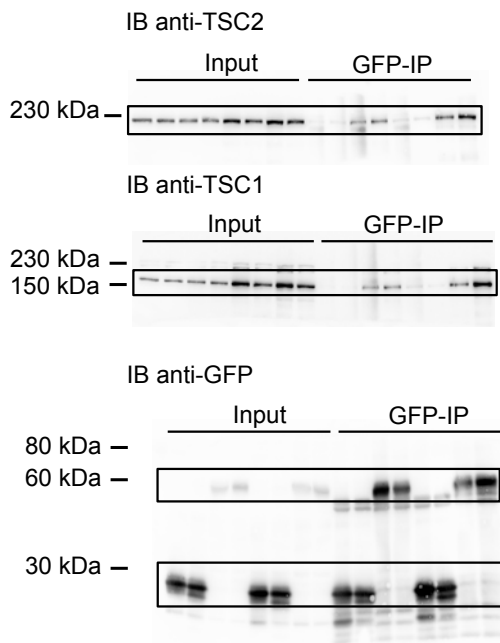

**Figure 5d**

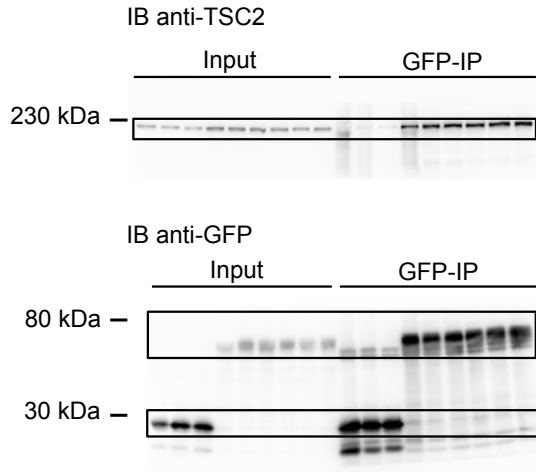

**Figure 5e**

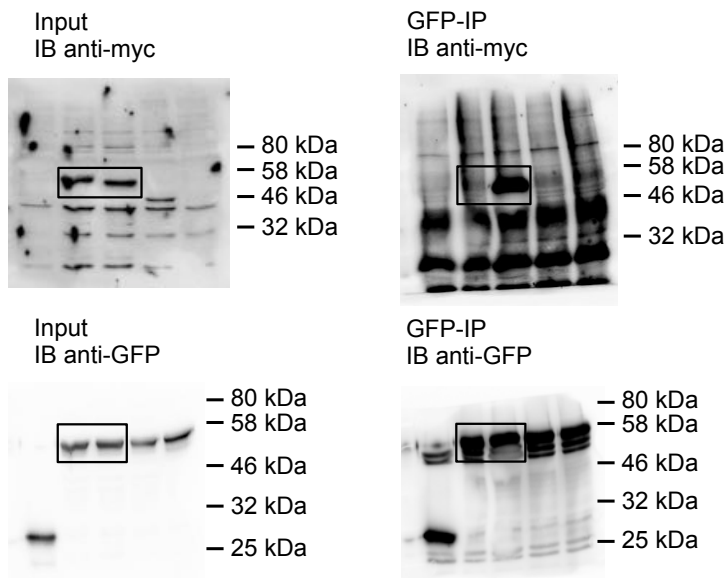

**Figure 5f**

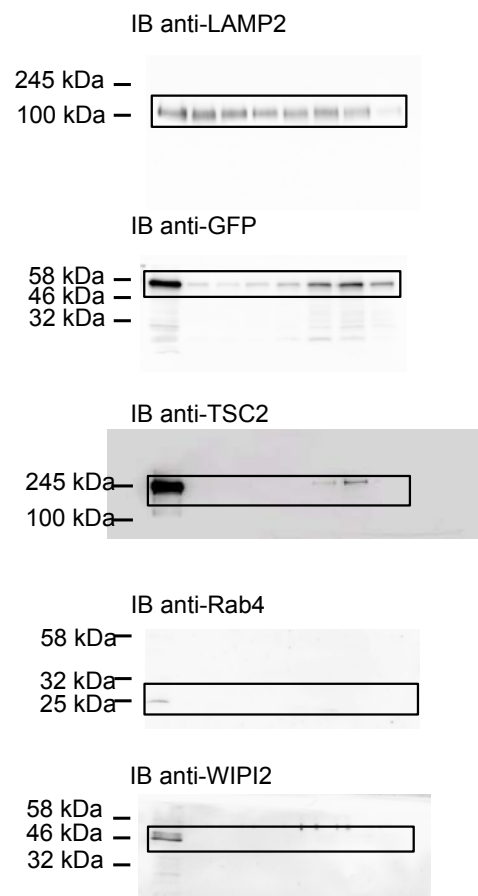

**Figure 5i**

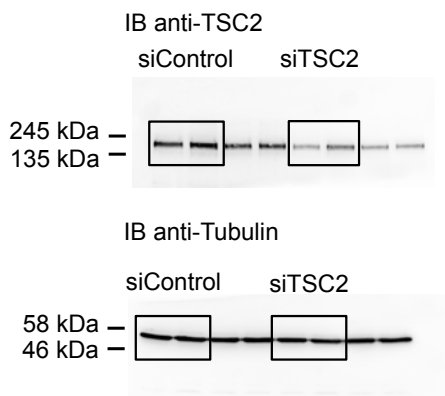

# Supplementary Figure 9

**Figure 5j**

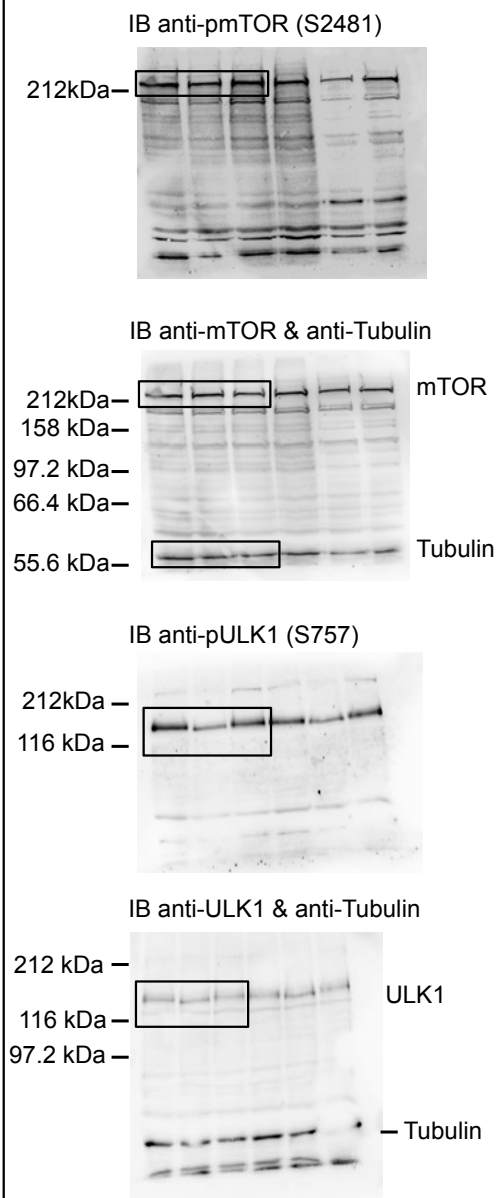

**Figure 6a**

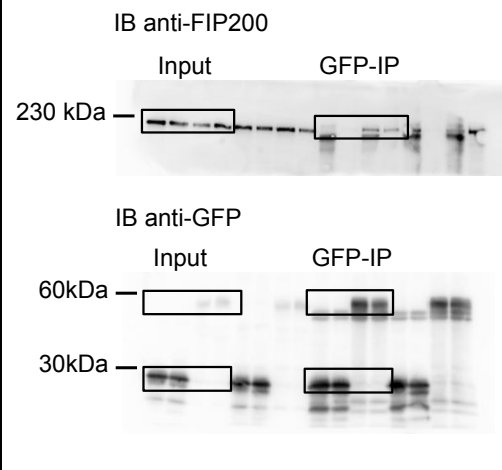

**Figure 6d**

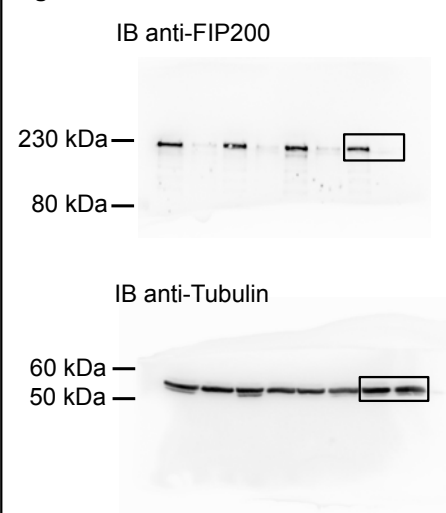

**Figure 7a**

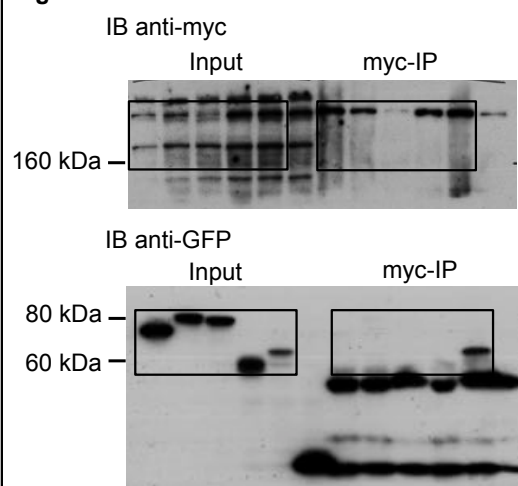

## Supplementary Figure 9

**Figure 7b**

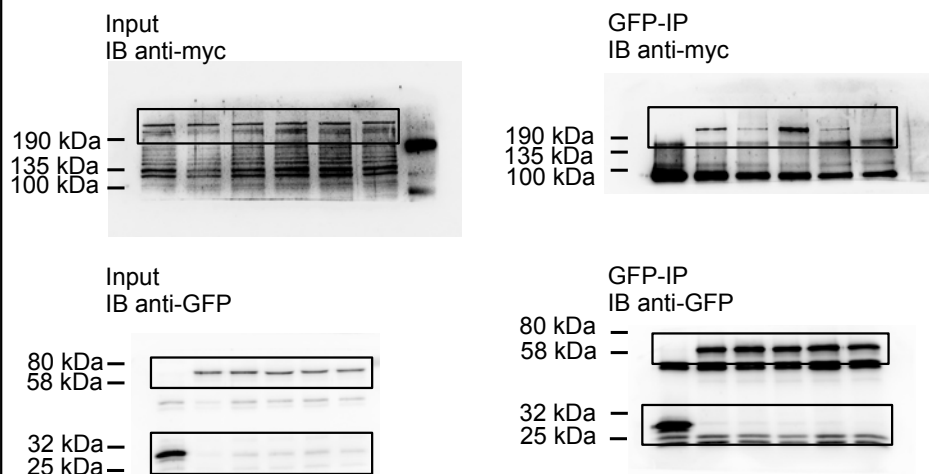

**Figure 7f**

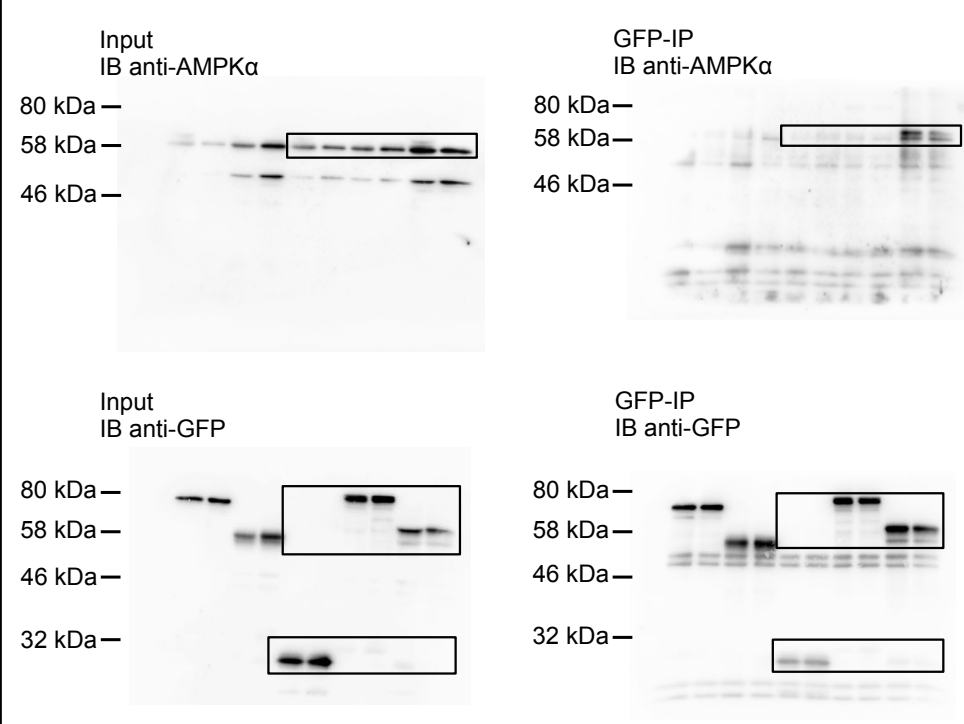

# Supplementary Figure 9

**Figure 7g**

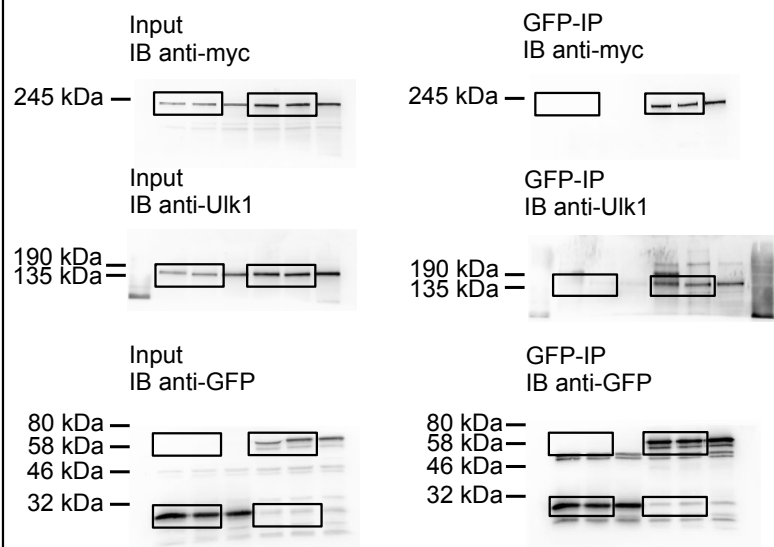

**Figure 7h**

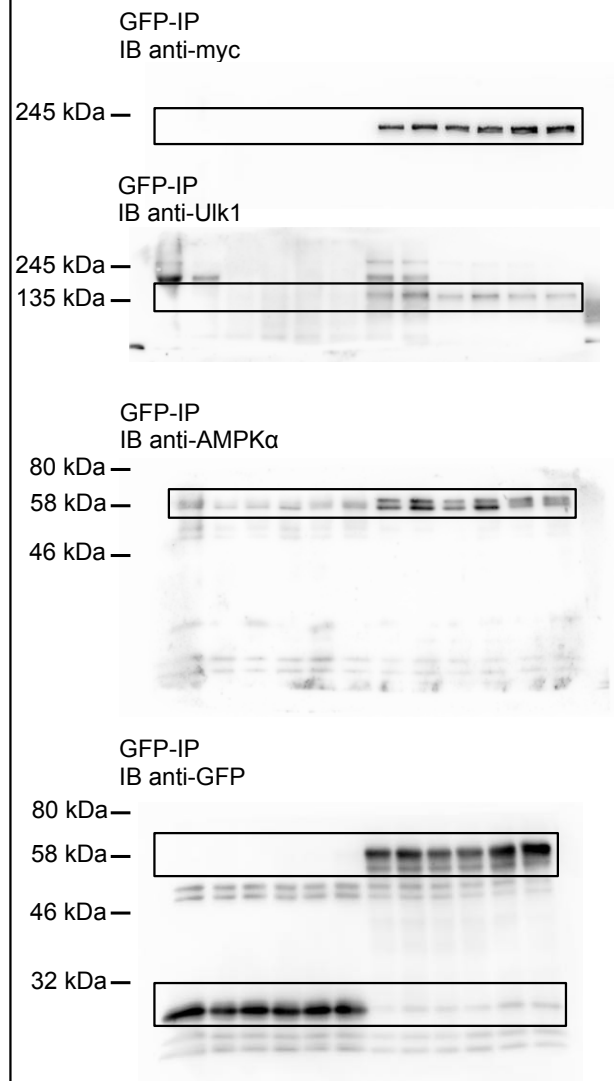

**Figure 7j**

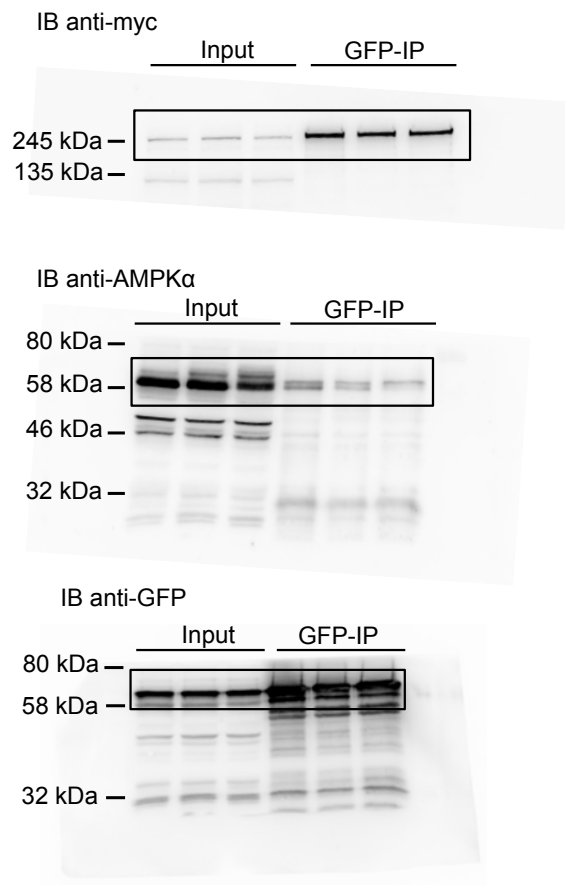

# Supplementary Figure 9

**Figure 7k**

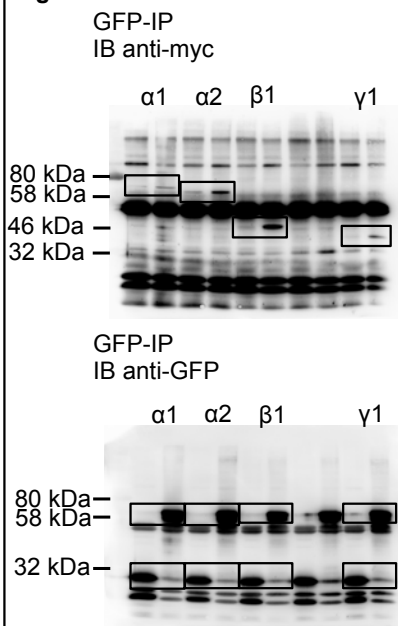

**Figure 8d**

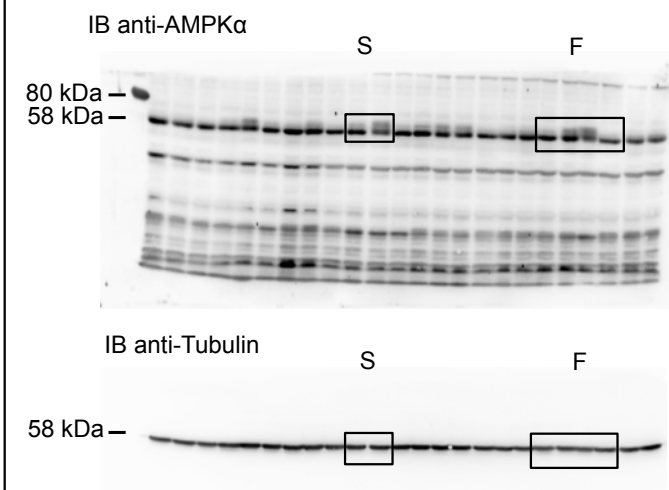

**Figure 8b**

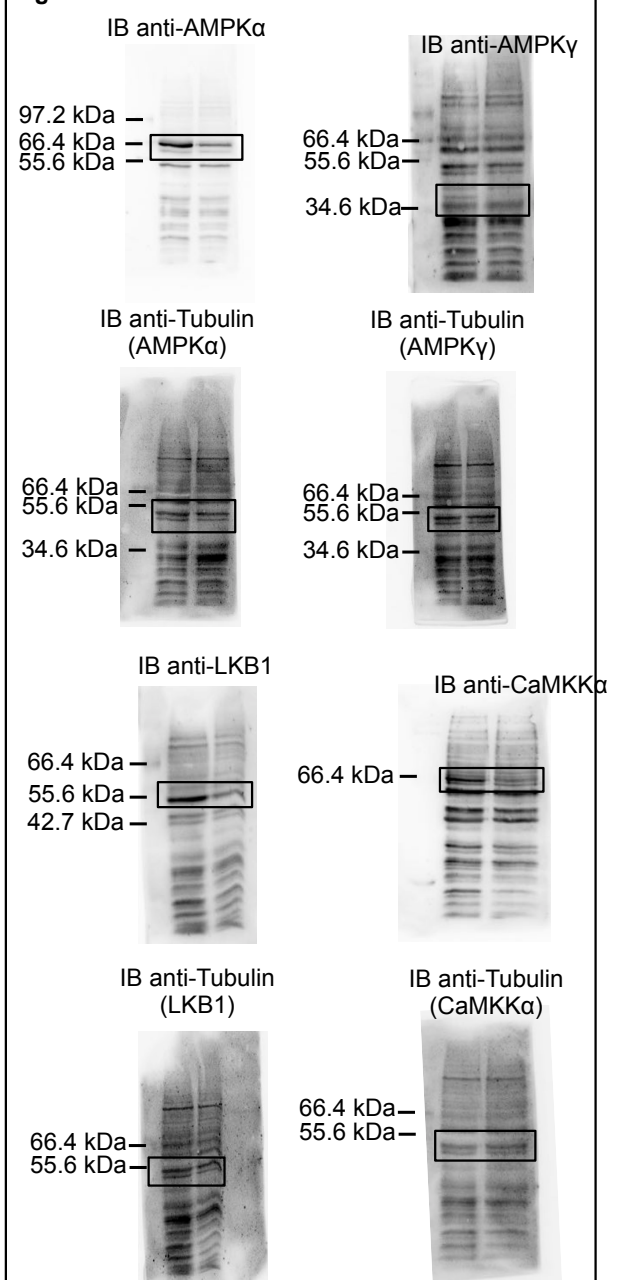

# Supplementary Figure 9

**Supplementary Figure 1b**

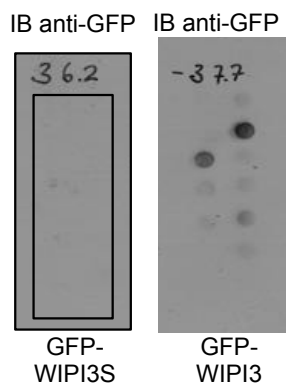

**Supplementary Figure 1d**

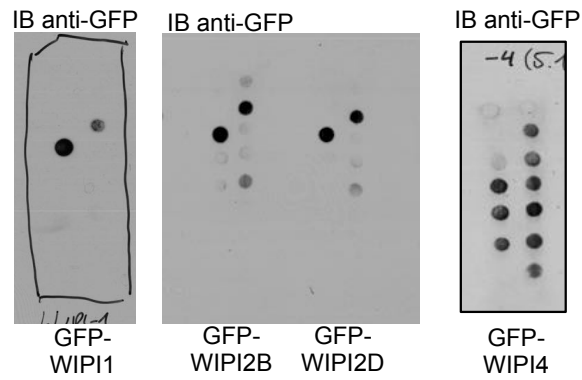

**Supplementary Figure 1c**

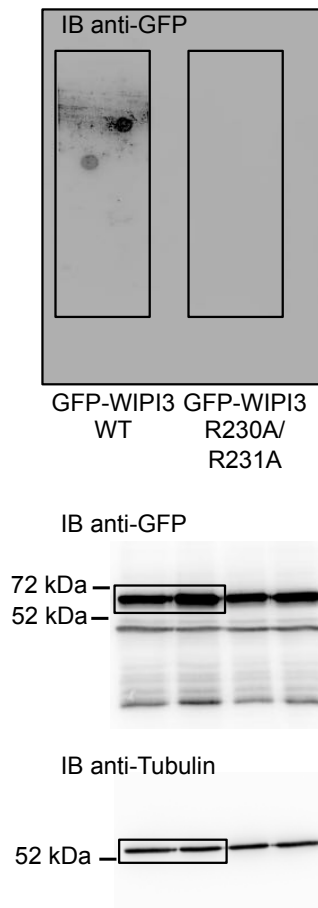

**Supplementary Figure 3a**

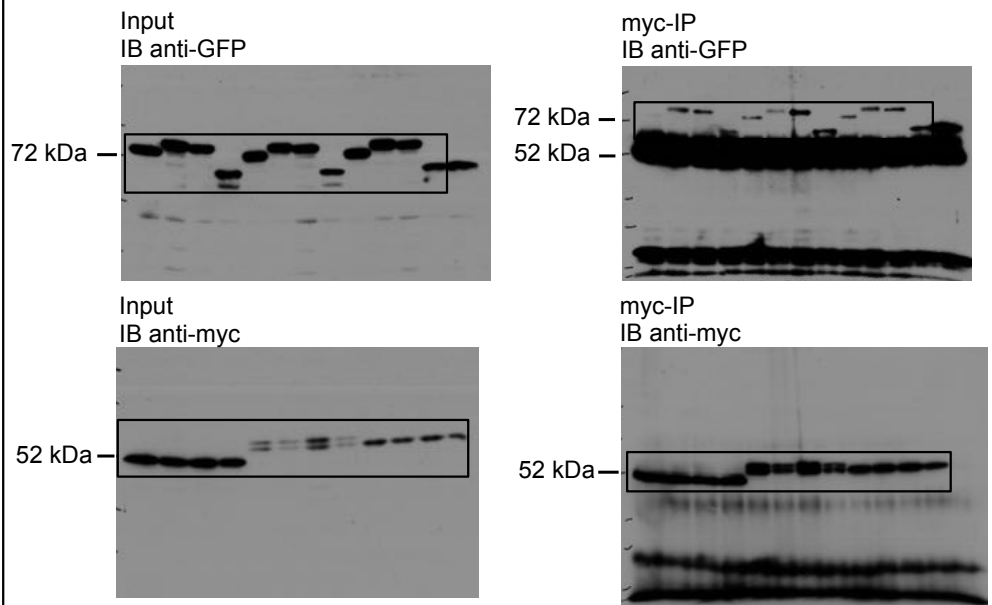

## Supplementary Figure 9

**Supplementary Figure 3b**

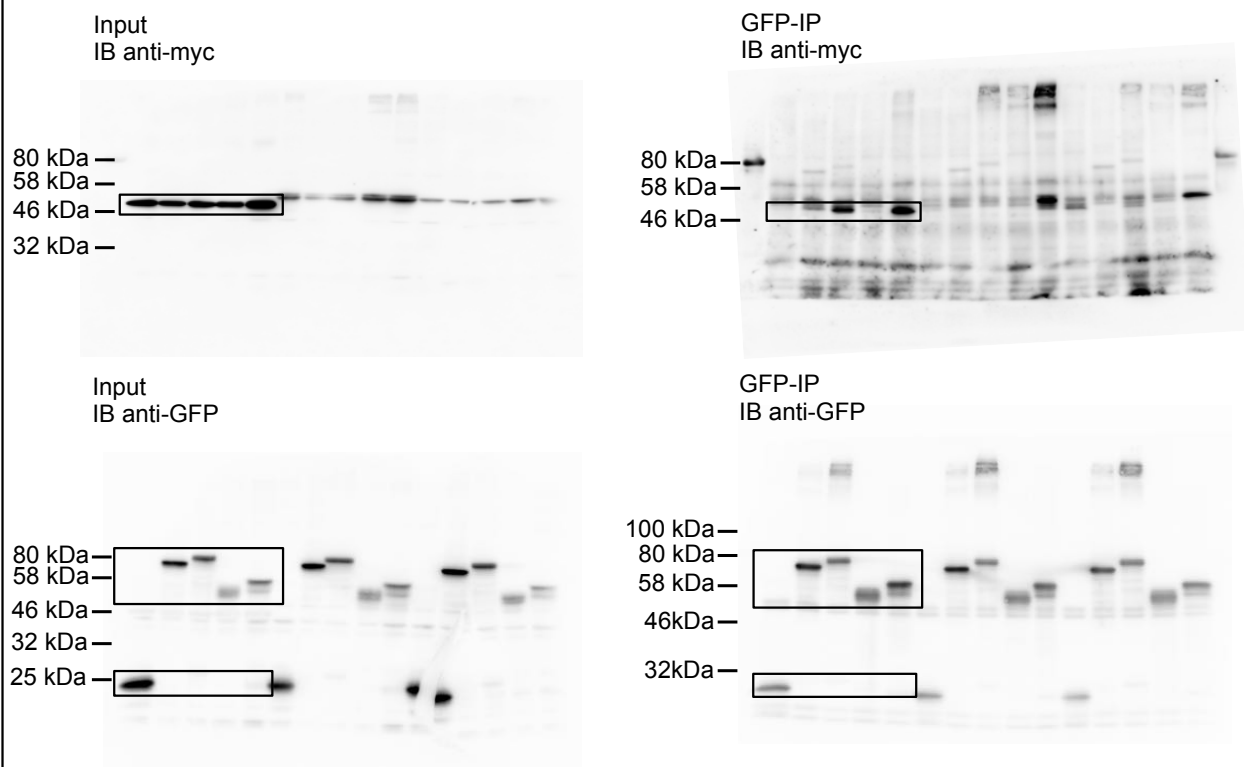

**Supplementary Figure 4**

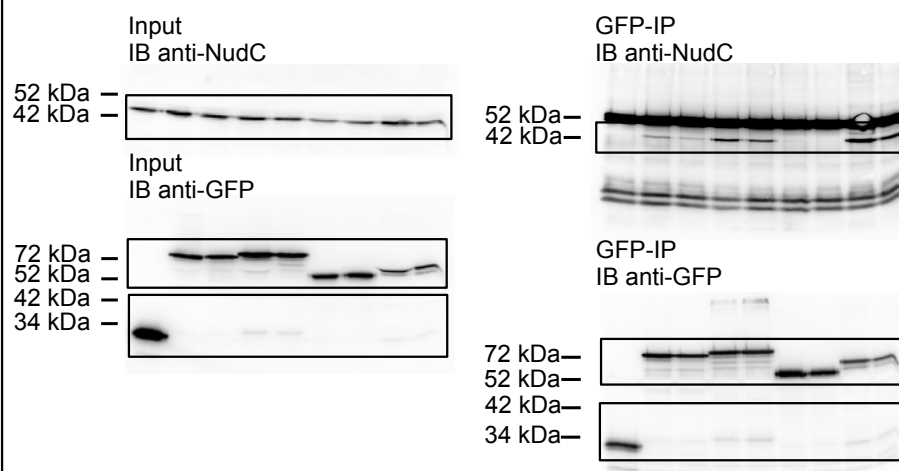

# Supplementary Figure 9

**Supplementary Figure 7a**

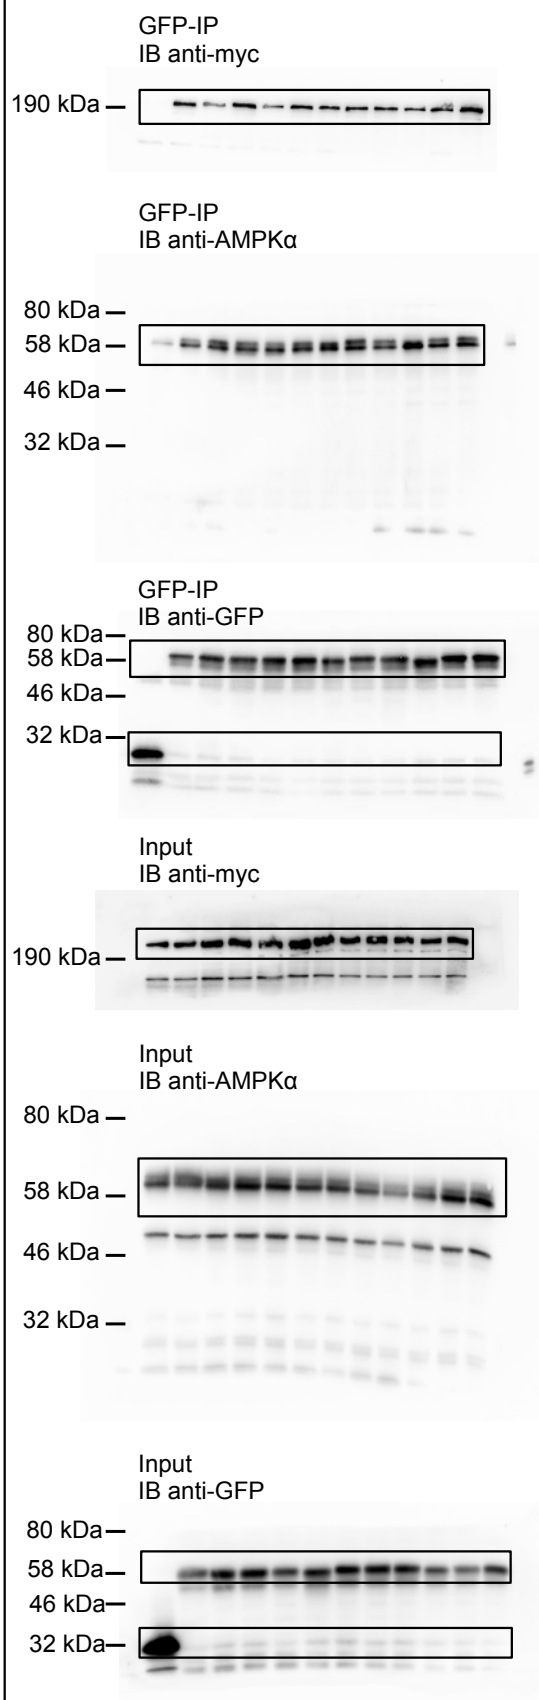

**Supplementary Figure 7b**

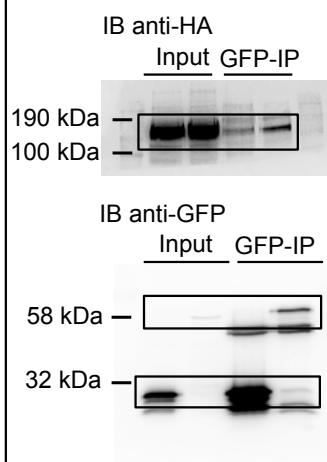

**Supplementary Figure 7c**

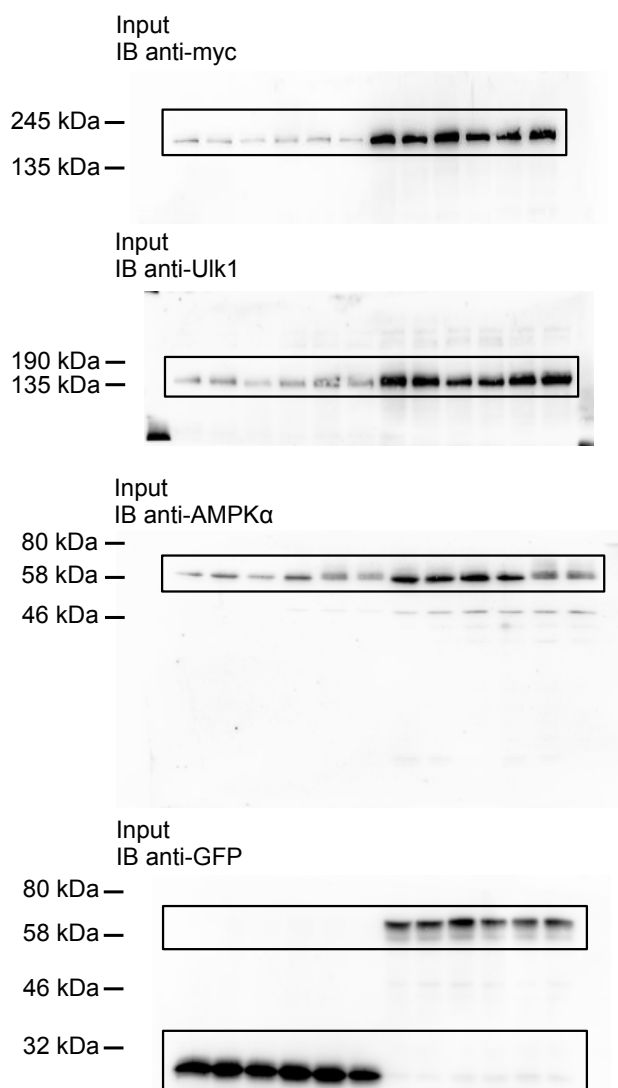

## Supplementary Figure 9

**Supplementary Figure 7d**

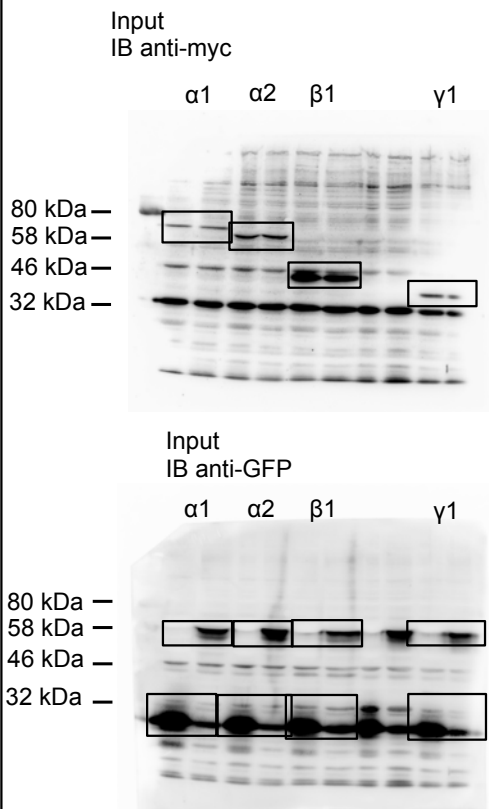

**Supplementary Figure 8c**

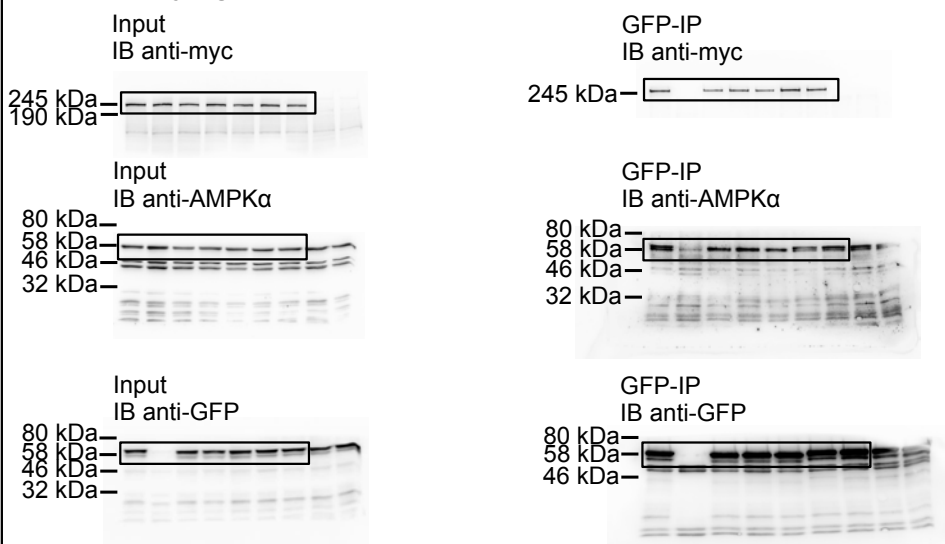

**Supplementary Figure 9** Uncropped immunoblotting scans. For each immunoblot shown in Figures 1b, 2f, 4a, 5a, 5b, 5c, 5d, 5e, 5f, 5i, 5j, 6a, 6d, 7a, 7b, 7f, 7g, 7h, 7j, 7k, 8b, 8d and Supplementary Figures 1b, 1c, 1d, 3a, 3b, 4, 7a, 7b, 7c, 7d, 8c, uncropped scans are provided along with the location of molecular weight markers. Cropped sections presented in the corresponding Figures and Supplementary Figures are boxed. IB: immunoblot; IP: immunoprecipitation.

## SUPPLEMENTARY NOTE 1

### WIPI3 variants employed in this study

Initially, we employed our original WIPI3 cloning isolate<sup>1</sup> (referred to as WIPI3S in the Supplementary Figure 1), but structural homology modelling revealed that WIPI3S lacked the potential to fold into a 7-bladed  $\beta$ -propeller protein and was unable to bind to phosphoinositides (Supplementary Figure 1b). Based on these findings, we assessed an additional WIPI3 cloning isolate that encoded an N-terminal extended WIPI3 protein sequence (Supplementary Figure 1a). This N-terminal extended version of WIPI3 indeed folds into a 7-bladed  $\beta$ -propeller protein (Figure 1a) and specifically binds PtdIns3P and PtdIns(3,5)P<sub>2</sub> (Figure 1b, Supplementary Figure 1b, d), a hallmark feature of the PROPPIN family<sup>2</sup>. In support of this observation, site-directed mutagenesis of two conserved arginine residues critical for phosphoinositide binding in PROPPIN members<sup>2</sup> abolished the binding of the WIPI3-R230A/R231A mutant to PtdIns3P and PtdIns(3,5)P<sub>2</sub> (Supplementary Figure 1c). As expected, endogenous WIPI1, WIPI2 and WIPI4 (Figure 1b, left panels; Supplementary Figure 1d), along with their GFP-tagged variants (Supplementary Figure 1d), bound PtdIns3P and PtdIns(3,5)P<sub>2</sub>. GFP-WIPI3 also bound PtdIns3P and PtdIns(3,5)P<sub>2</sub> (Figure 1b, left panel; Supplementary Figure 1b-d).

### SUPPLEMENTARY REFERENCES

1. Proikas-Cezanne, T. *et al.* WIPI-1alpha (WIPI49), a member of the novel 7-bladed WIPI protein family, is aberrantly expressed in human cancer and is linked to starvation-induced autophagy. *Oncogene* **23**, 9314-9325 (2004).
2. Thumm, M. *et al.* It takes two to tango: PROPPINs use two phosphoinositide-binding sites. *Autophagy* **9**, 106-107 (2013).
